# Supplementary material for: A Bayesian dose–response meta-analysis model: A simulations study and application
Source: PubMed Central journal article supplement — Stat Methods Med Res. 2021 May;30(5):1358–72. doi: 10.1177/0962280220982643 (PMC8209313; doi:10.1177/0962280220982643), 2021-05
Supplement: sj-pdf-1-smm-10.1177_0962280220982643.pdf [file sj-pdf-1-smm-10.1177_0962280220982643.pdf]

# A Bayesian dose-response meta-analysis model: supplementary material

Tasnim Hamza<sup>1</sup>, Andrea Cipriani<sup>2</sup>, Toshi A. Furukawa<sup>3</sup>, Matthias Egger<sup>1</sup>, Nicola Orsini<sup>4</sup>, Georgia Salanti<sup>1</sup>.

<sup>1</sup>Institute of Social and Preventive Medicine, University of Bern, Bern, Switzerland. <sup>2</sup>Department of Psychiatry, University of Oxford. <sup>3</sup>Department of Health Promotion and Human Behavior, and Department of Clinical Epidemiology, Graduate School of Medicine/School of Public Health, Kyoto University, Kyoto, Japan.

<sup>4</sup>Department of Global Public Health, Karolinska Institutet, Stockholm, Sweden.

## 1. Additional results from simulations on OR

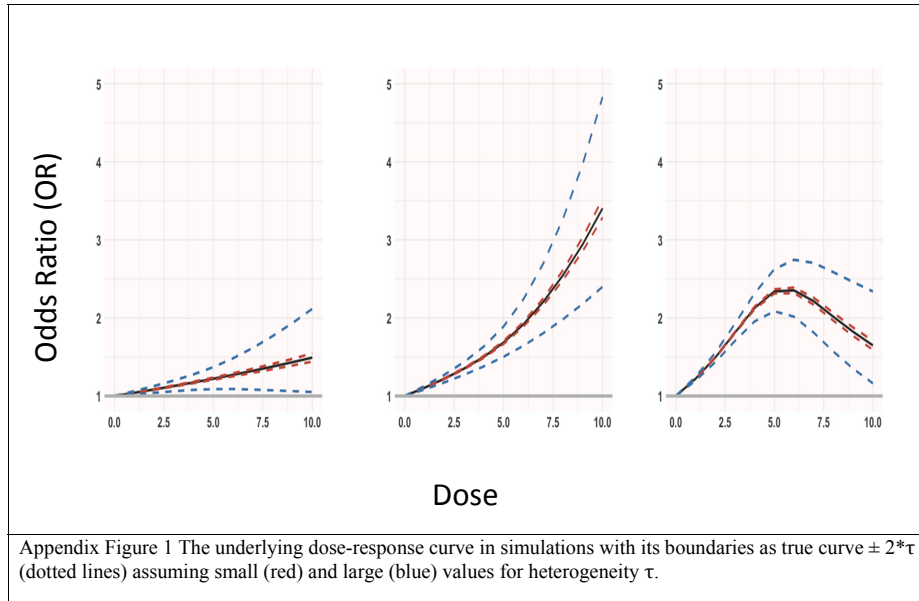

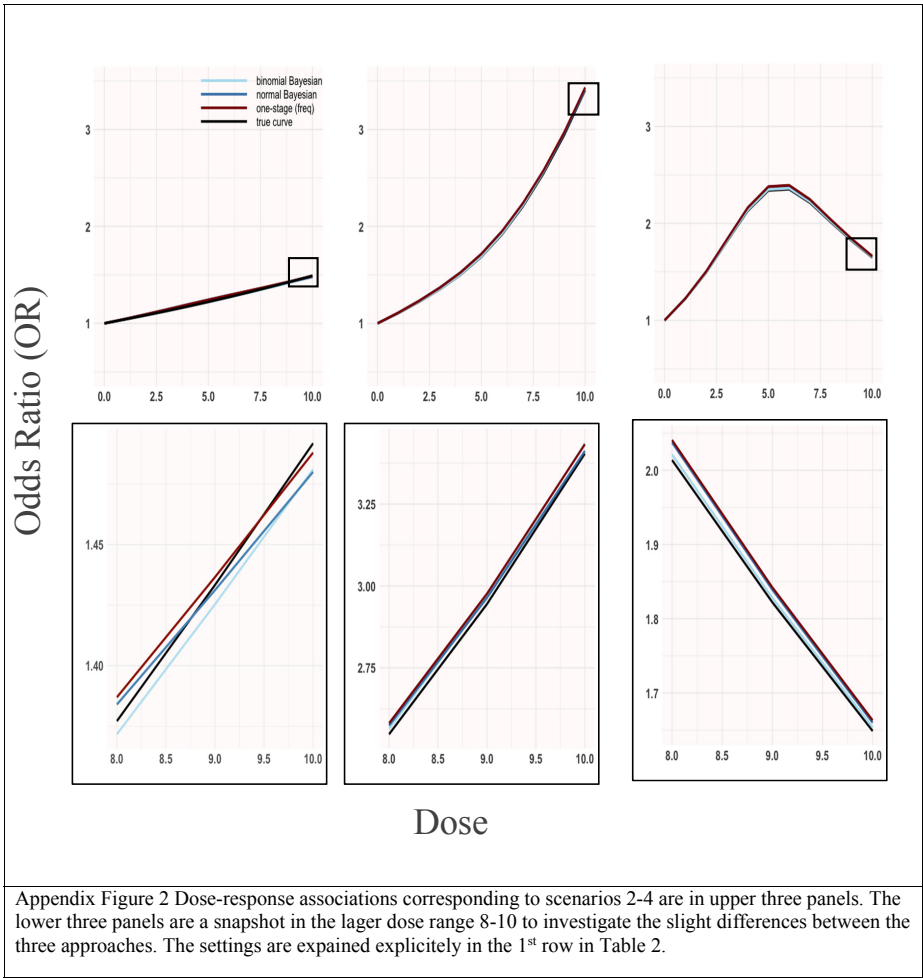

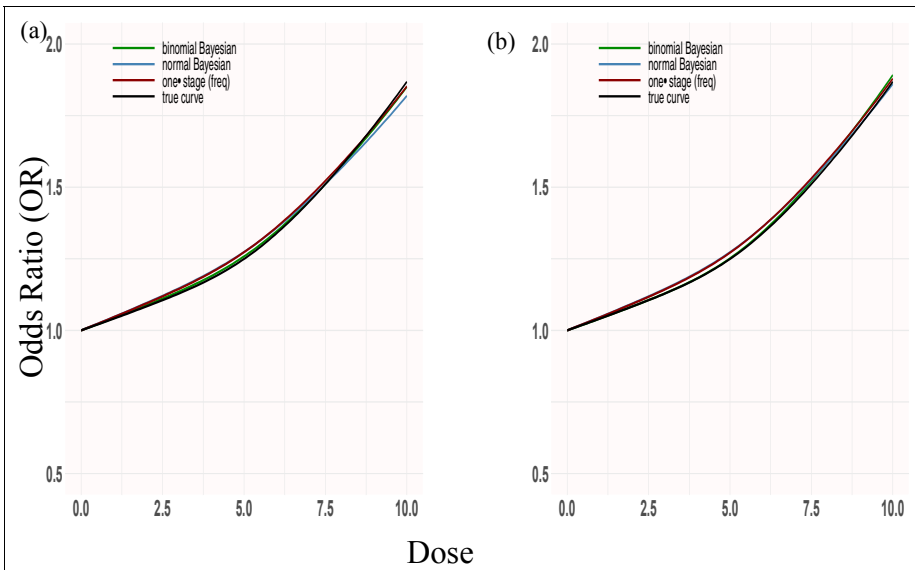

Appendix Figure 333 Dose-response associations corresponding to the fourth simulation setting in Table 2. In that setting, we generated data with (a) 8 and (b) 16 trials.

Formatted: Font color: Text 1

Formatted: Font color: Text 1

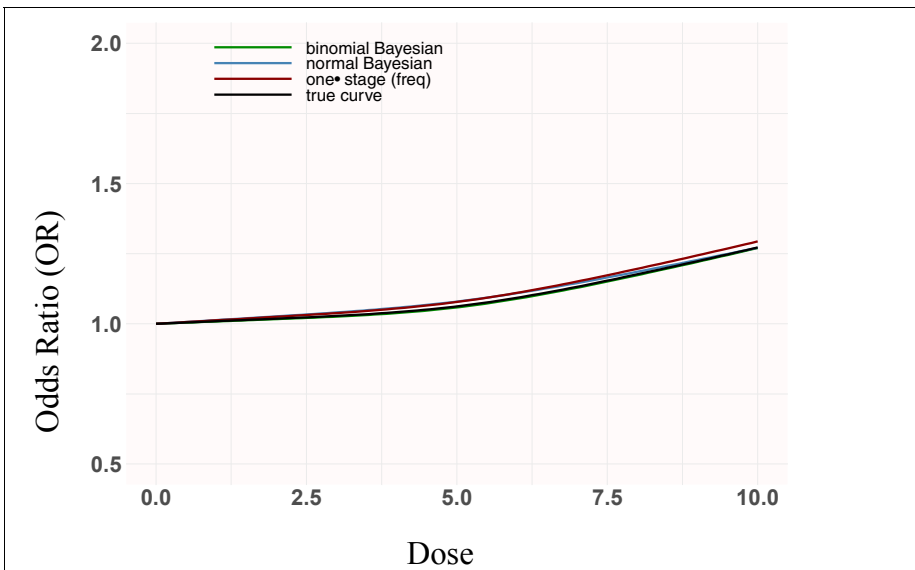

Appendix Figure 444 Dose-response associations corresponding to the fifth simulation setting in Table 2. In that setting, we generated the doses of half of the studies from Unif(1,6) and in the other half from Unif(4,10).

Formatted: Font color: Text 1

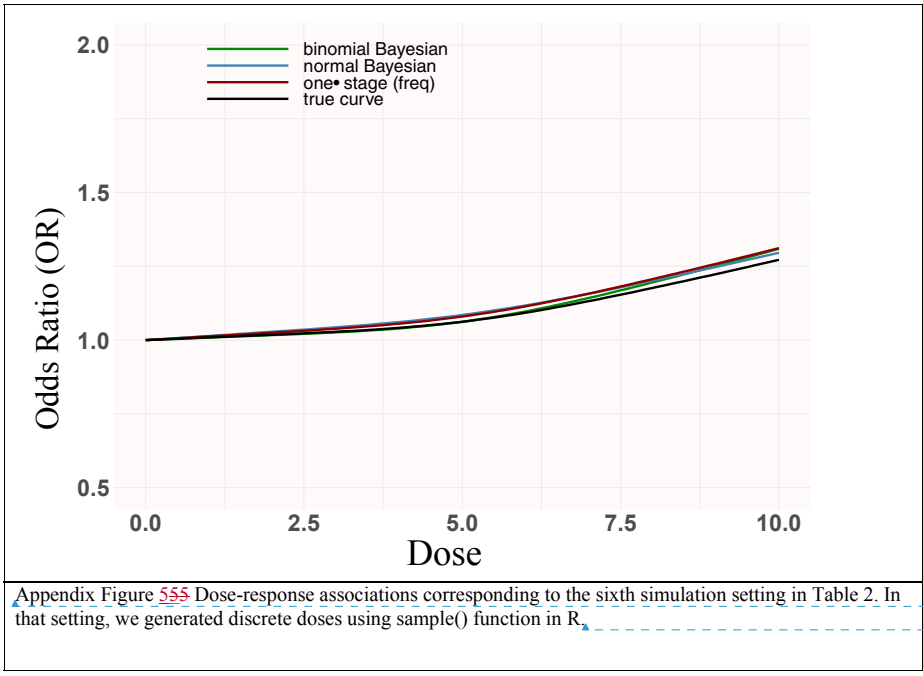

Formatted: Font color: Text 1

Formatted: Font color: Text 1

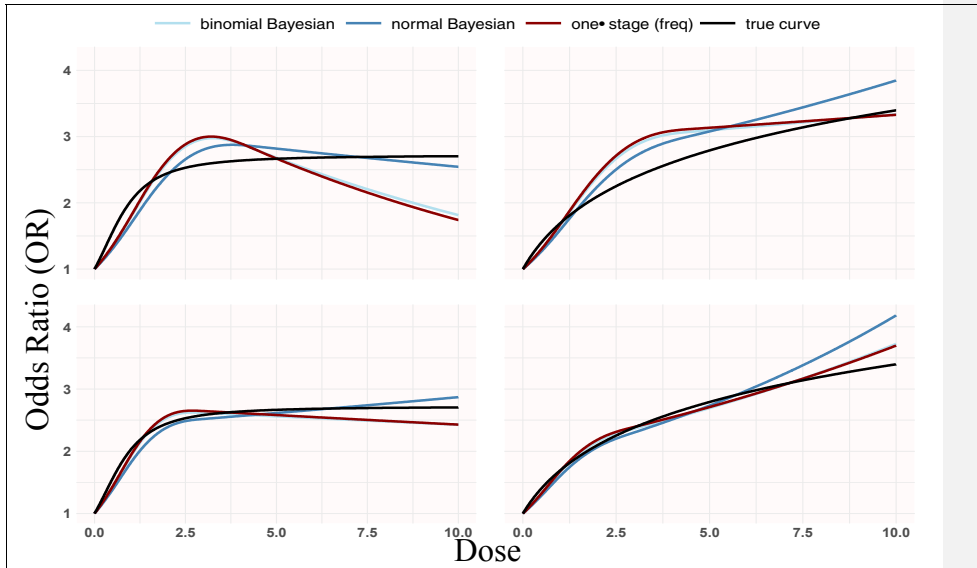

Appendix Figure 66, Appendix Figure 6 Simulation results for the half-sigmoid model (a,c) and the log-dose model (b,d) as the true dose-response curve (black) and the three estimated dose-response curves using restricted cubic splines (see Table 1). Knots are placed in 10%, 50% and 90% quantiles (doses 0.2, 1.3 and 4.3) in panels a and b and at doses 0, 1, 3 in panels c and d. The doses are generated from  $\chi^2(2)$ .

Formatted: Font: 10 pt, Not Italic, Font color: Text 1

Formatted: Font color: Text 1

Appendix Table 1 Assuming odds ratio (OR) as a measure of the treatment effect, 8 scenarios are simulated for a spline dose-response association with random effects coefficients. We assume 40 trials reporting aggregated-level data with three dose-levels each. The results for the linear coefficient  $B_1$ .

| True $B_1$       |                         | 0      | 0.04   | 0.1    | 0.2    | 0      | 0.04   | 0.1    | 0.2    |
|------------------|-------------------------|--------|--------|--------|--------|--------|--------|--------|--------|
| True $\tau$      |                         | 0.001  | 0.001  | 0.001  | 0.001  | 0.01   | 0.01   | 0.01   | 0.01   |
| Bias             | binomial Bayesian       | 0.0001 | 0.0002 | 0.0004 | 0.001  | 0.0004 | 0.0008 | 0.0009 | 0.002  |
|                  | normal Bayesian         | 0.0055 | 0.0049 | 0.0045 | 0.0038 | 0.0058 | 0.0056 | 0.0048 | 0.0046 |
|                  | one-stage (frequentist) | 0.0048 | 0.0043 | 0.004  | 0.0041 | 0.0052 | 0.005  | 0.0044 | 0.0049 |
| Coverage         | binomial Bayesian       | 0.954  | 0.964  | 0.944  | 0.953  | 0.96   | 0.951  | 0.954  | 0.951  |
|                  | normal Bayesian         | 0.937  | 0.95   | 0.921  | 0.943  | 0.939  | 0.925  | 0.944  | 0.935  |
|                  | one-stage (frequentist) | 0.95   | 0.959  | 0.936  | 0.953  | 0.949  | 0.936  | 0.954  | 0.947  |
| MSE              | binomial Bayesian       | 0.0002 | 0.0002 | 0.0002 | 0.0001 | 0.0002 | 0.0002 | 0.0002 | 0.0001 |
|                  | normal Bayesian         | 0.0002 | 0.0002 | 0.0002 | 0.0002 | 0.0002 | 0.0002 | 0.0002 | 0.0002 |
|                  | one-stage (frequentist) | 0.0002 | 0.0002 | 0.0002 | 0.0002 | 0.0002 | 0.0002 | 0.0002 | 0.0002 |
| Power            | binomial Bayesian       | -      | 0.872  | 1      | 1      | -      | 0.851  | 1      | 1      |
|                  | normal Bayesian         | -      | 0.926  | 1      | 1      | -      | 0.923  | 1      | 1      |
|                  | one-stage (frequentist) | -      | 0.914  | 1      | 1      | -      | 0.893  | 1      | 1      |
| Se2mean          | binomial Bayesian       | 0.0002 | 0.0002 | 0.0002 | 0.0001 | 0.0002 | 0.0002 | 0.0002 | 0.0001 |
|                  | normal Bayesian         | 0.0002 | 0.0002 | 0.0002 | 0.0001 | 0.0002 | 0.0002 | 0.0002 | 0.0001 |
|                  | one-stage (frequentist) | 0.0002 | 0.0002 | 0.0002 | 0.0002 | 0.0002 | 0.0002 | 0.0002 | 0.0002 |
| MCse (bias)      | binomial Bayesian       | 0.0004 | 0.0004 | 0.0004 | 0.0004 | 0.0004 | 0.0004 | 0.0004 | 0.0004 |
|                  | normal Bayesian         | 0.0004 | 0.0004 | 0.0004 | 0.0004 | 0.0004 | 0.0004 | 0.0004 | 0.0004 |
|                  | one-stage (frequentist) | 0.0004 | 0.0004 | 0.0004 | 0.0004 | 0.0004 | 0.0004 | 0.0004 | 0.0004 |
| $\sqrt{\hat{R}}$ | binomial Bayesian       | 1.0082 | 1.0088 | 1.0083 | 1.0073 | 1.0069 | 1.0068 | 1.0075 | 1.0063 |
|                  | normal Bayesian         | 1.0052 | 1.0055 | 1.0052 | 1.0045 | 1.0047 | 1.0046 | 1.0047 | 1.0039 |

Appendix Table 2 Assuming odds ratio (OR) as a measure of the treatment effect, 8 scenarios are simulated for a spline dose-response association with random effects coefficients. We assume 40 trials reporting aggregated-level data with three dose-levels each. The results for the spline coefficient  $B_2$ .

| True $B_2$  |                         | 0       | 0       | 0.03    | -0.2    | 0       | 0       | 0.03    | -0.2    |
|-------------|-------------------------|---------|---------|---------|---------|---------|---------|---------|---------|
| True $\tau$ |                         | 0.001   | 0.001   | 0.001   | 0.001   | 0.01    | 0.01    | 0.01    | 0.01    |
| Bias        | binomial Bayesian       | -0.0003 | -0.0012 | 0.0007  | -0.0009 | -0.0008 | 0.0004  | 0       | -0.0026 |
|             | normal Bayesian         | -0.0071 | -0.0075 | -0.0057 | -0.0042 | -0.0078 | -0.0064 | -0.0063 | -0.0057 |
|             | one-stage (frequentist) | -0.005  | -0.0061 | -0.0043 | -0.0043 | -0.006  | -0.0048 | -0.0048 | -0.0059 |
| Coverage    | binomial Bayesian       | 0.952   | 0.956   | 0.955   | 0.961   | 0.953   | 0.954   | 0.95    | 0.955   |
|             | normal Bayesian         | 0.946   | 0.945   | 0.947   | 0.954   | 0.948   | 0.952   | 0.948   | 0.938   |
|             | one-stage (frequentist) | 0.959   | 0.952   | 0.96    | 0.961   | 0.955   | 0.957   | 0.954   | 0.945   |
| MSE         | binomial Bayesian       | 0.0008  | 0.0007  | 0.0006  | 0.0005  | 0.0009  | 0.0007  | 0.0006  | 0.0005  |
|             | normal Bayesian         | 0.0008  | 0.0007  | 0.0006  | 0.0005  | 0.0009  | 0.0007  | 0.0006  | 0.0006  |
|             | one-stage (frequentist) | 0.0008  | 0.0007  | 0.0006  | 0.0005  | 0.0009  | 0.0007  | 0.0006  | 0.0006  |
| Power       | binomial Bayesian       | -       | -       | 0.275   | 1       | -       | -       | 0.248   | 1       |
|             | normal Bayesian         | -       | -       | 0.204   | 1       | -       | -       | 0.194   | 1       |
|             | one-stage (frequentist) | -       | -       | 0.201   | 1       | -       | -       | 0.197   | 1       |
| Se2mean     | binomial Bayesian       | 0.0009  | 0.0007  | 0.0006  | 0.0005  | 0.0009  | 0.0007  | 0.0006  | 0.0006  |
|             | normal Bayesian         | 0.0009  | 0.0007  | 0.0006  | 0.0006  | 0.0009  | 0.0007  | 0.0006  | 0.0006  |
|             | one-stage (frequentist) | 0.0009  | 0.0008  | 0.0007  | 0.0006  | 0.0009  | 0.0008  | 0.0007  | 0.0006  |
| MCse (bias) | binomial Bayesian       | 0.0009  | 0.0008  | 0.0008  | 0.0007  | 0.0009  | 0.0008  | 0.0008  | 0.0007  |
|             | normal Bayesian         | 0.0009  | 0.0008  | 0.0007  | 0.0007  | 0.0009  | 0.0008  | 0.0008  | 0.0007  |
|             | one-stage (frequentist) | 0.0009  | 0.0008  | 0.0008  | 0.0007  | 0.0009  | 0.0008  | 0.0008  | 0.0008  |
| $\sqrt{R}$  | binomial Bayesian       | 1.01    | 1.0102  | 1.0095  | 1.0086  | 1.0081  | 1.0079  | 1.0085  | 1.0074  |
|             | normal Bayesian         | 1.0066  | 1.007   | 1.0064  | 1.0056  | 1.0059  | 1.0055  | 1.0057  | 1.0048  |



Appendix Table 3 Assuming odds ratio (OR) as a measure of the treatment effect, 8 scenarios are simulated for a spline dose-response association with random effects coefficients. We assume 40 trials reporting aggregated-level data with three dose-levels each. The results for the common heterogeneity  $\tau$ .

| True $\tau$      |                   | 0.001  | 0.001  | 0.001  | 0.001  | 0.01   | 0.01   | 0.01   | 0.01   |
|------------------|-------------------|--------|--------|--------|--------|--------|--------|--------|--------|
| True $B_2$       |                   | 0      | 0      | 0.03   | -0.2   | 0      | 0      | 0.03   | -0.2   |
| True $B_1$       |                   | 0      | 0.04   | 0.1    | 0.2    | 0      | 0.04   | 0.1    | 0.2    |
| Bias             | binomial Bayesian | 0.0124 | 0.0118 | 0.0105 | 0.0108 | 0.0051 | 0.0044 | 0.0033 | 0.0037 |
|                  | normal Bayesian   | 0.013  | 0.0126 | 0.0116 | 0.0117 | 0.0055 | 0.0051 | 0.0041 | 0.0047 |
| Coverage         | binomial Bayesian | 0.938  | 0.934  | 0.956  | 0.942  | 0.982  | 0.977  | 0.975  | 0.986  |
|                  | normal Bayesian   | 0.914  | 0.906  | 0.907  | 0.906  | 0.981  | 0.975  | 0.971  | 0.964  |
| MSE              | binomial Bayesian | 0.0002 | 0.0002 | 0.0001 | 0.0001 | 0.0001 | 0.0001 | 0      | 0      |
|                  | normal Bayesian   | 0.0002 | 0.0002 | 0.0002 | 0.0002 | 0.0001 | 0.0001 | 0.0001 | 0.0001 |
| Power            | binomial Bayesian | 0.078  | 0.082  | 0.065  | 0.068  | 0.149  | 0.162  | 0.169  | 0.17   |
|                  | normal Bayesian   | 0.109  | 0.116  | 0.127  | 0.129  | 0.161  | 0.2    | 0.215  | 0.234  |
| Se2mean          | binomial Bayesian | 0.0001 | 0.0001 | 0.0001 | 0.0001 | 0.0001 | 0.0001 | 0.0001 | 0.0001 |
|                  | normal Bayesian   | 0.0001 | 0.0001 | 0.0001 | 0.0001 | 0.0001 | 0.0001 | 0.0001 | 0.0001 |
| MCSe (bias)      | binomial Bayesian | 0.0002 | 0.0002 | 0.0001 | 0.0001 | 0.0002 | 0.0002 | 0.0002 | 0.0002 |
|                  | normal Bayesian   | 0.0002 | 0.0002 | 0.0002 | 0.0002 | 0.0002 | 0.0002 | 0.0002 | 0.0002 |
| $\sqrt{\hat{R}}$ | binomial Bayesian | 1.0208 | 1.0215 | 1.0199 | 1.0204 | 1.0198 | 1.0199 | 1.0211 | 1.0209 |
|                  | normal Bayesian   | 1.0147 | 1.015  | 1.0149 | 1.0155 | 1.0161 | 1.0148 | 1.0151 | 1.0171 |

Appendix Table 4 Assuming odds ratio (OR) as a measure of the treatment effect, 8 scenarios are simulated for a spline dose-response association with random effects coefficients. We assumed 20 trials reporting aggregated-level data with three dose-levels each, where sample size is generated from Unif(20, 100). The results for the linear coefficient  $B_1$ .

| True $B_1$       |                         | 0      | 0.04   | 0.1    | 0.2    | 0      | 0.04   | 0.1    | 0.2    |
|------------------|-------------------------|--------|--------|--------|--------|--------|--------|--------|--------|
| True $\tau$      |                         | 0.001  | 0.001  | 0.001  | 0.001  | 0.01   | 0.01   | 0.01   | 0.01   |
| Bias             | binomial Bayesian       | 0.0021 | 0.0017 | 0.0021 | 0.0039 | 0.0022 | 0.0043 | 0.0045 | 0.0042 |
|                  | normal Bayesian         | 0.0237 | 0.0214 | 0.0203 | 0.0134 | 0.0247 | 0.0246 | 0.0217 | 0.0145 |
|                  | one-stage (frequentist) | 0.022  | 0.0201 | 0.0189 | 0.0172 | 0.0231 | 0.0233 | 0.0202 | 0.0176 |
| Coverage         | binomial Bayesian       | 0.958  | 0.964  | 0.962  | 0.976  | 0.968  | 0.959  | 0.951  | 0.962  |
|                  | normal Bayesian         | 0.911  | 0.916  | 0.909  | 0.94   | 0.915  | 0.894  | 0.879  | 0.919  |
|                  | one-stage (frequentist) | 0.927  | 0.937  | 0.947  | 0.941  | 0.938  | 0.918  | 0.908  | 0.929  |
| MSE              | binomial Bayesian       | 0.0013 | 0.0012 | 0.0011 | 0.0009 | 0.0012 | 0.0012 | 0.0012 | 0.001  |
|                  | normal Bayesian         | 0.0019 | 0.0018 | 0.0017 | 0.0013 | 0.0019 | 0.002  | 0.0019 | 0.0015 |
|                  | one-stage (frequentist) | 0.0019 | 0.0019 | 0.0017 | 0.0015 | 0.0019 | 0.0021 | 0.0019 | 0.0017 |
| Power            | binomial Bayesian       | -      | 0.215  | 0.844  | 0.999  | -      | 0.236  | 0.867  | 1      |
|                  | normal Bayesian         | -      | 0.388  | 0.92   | 0.999  | -      | 0.404  | 0.93   | 1      |
|                  | one-stage (frequentist) | -      | 0.315  | 0.882  | 0.999  | -      | 0.343  | 0.894  | 1      |
| Se2mean          | binomial Bayesian       | 0.0014 | 0.0013 | 0.0012 | 0.0011 | 0.0015 | 0.0013 | 0.0012 | 0.0011 |
|                  | normal Bayesian         | 0.0015 | 0.0014 | 0.0012 | 0.0011 | 0.0015 | 0.0014 | 0.0012 | 0.0011 |
|                  | one-stage (frequentist) | 0.0018 | 0.0017 | 0.0015 | 0.0014 | 0.0018 | 0.0017 | 0.0015 | 0.0014 |
| MCse (bias)      | binomial Bayesian       | 0.0011 | 0.0011 | 0.0011 | 0.0009 | 0.0011 | 0.0011 | 0.0011 | 0.001  |
|                  | normal Bayesian         | 0.0012 | 0.0011 | 0.0011 | 0.0011 | 0.0011 | 0.0012 | 0.0012 | 0.0012 |
|                  | one-stage (frequentist) | 0.0012 | 0.0012 | 0.0012 | 0.0011 | 0.0012 | 0.0012 | 0.0012 | 0.0012 |
| $\sqrt{\hat{R}}$ | binomial Bayesian       | 1.0049 | 1.0049 | 1.005  | 1.005  | 1.0048 | 1.0051 | 1.0051 | 1.0049 |
|                  | normal Bayesian         | 1.0031 | 1.0029 | 1.0028 | 1.0028 | 1.003  | 1.0028 | 1.0027 | 1.0025 |

Appendix Table 5 Assuming odds ratio (OR) as a measure of the treatment effect, 8 scenarios are simulated for a spline dose-response association with random effects coefficients. We assumed 20 trials reporting aggregated-level data with three dose-levels each where sample size is generated from Unif(20, 100). The results for the spline coefficient  $B_2$ .

| True $B_2$  |                         | 0       | 0       | 0.03    | -0.2    | 0       | 0       | 0.03    | -0.2    |
|-------------|-------------------------|---------|---------|---------|---------|---------|---------|---------|---------|
| True $\tau$ |                         | 0.001   | 0.001   | 0.001   | 0.001   | 0.01    | 0.01    | 0.01    | 0.01    |
| Bias        | binomial Bayesian       | -0.0075 | -0.0025 | 0.0022  | -0.0032 | -0.0057 | -0.0059 | -0.0047 | -0.0023 |
|             | normal Bayesian         | -0.0358 | -0.031  | -0.0283 | -0.0122 | -0.0357 | -0.0345 | -0.0326 | -0.0144 |
|             | one-stage (frequentist) | -0.0301 | -0.027  | -0.0226 | -0.0196 | -0.0307 | -0.0298 | -0.0269 | -0.0204 |
| Coverage    | binomial Bayesian       | 0.964   | 0.972   | 0.96    | 0.965   | 0.975   | 0.961   | 0.961   | 0.963   |
|             | normal Bayesian         | 0.937   | 0.947   | 0.93    | 0.956   | 0.953   | 0.926   | 0.909   | 0.942   |
|             | one-stage (frequentist) | 0.954   | 0.969   | 0.948   | 0.957   | 0.964   | 0.938   | 0.936   | 0.946   |
| MSE         | binomial Bayesian       | 0.006   | 0.0052  | 0.0044  | 0.0036  | 0.006   | 0.0063  | 0.0048  | 0.0043  |
|             | normal Bayesian         | 0.007   | 0.0063  | 0.0058  | 0.0045  | 0.0069  | 0.0078  | 0.0066  | 0.0055  |
|             | one-stage (frequentist) | 0.0075  | 0.0072  | 0.0062  | 0.0052  | 0.0078  | 0.009   | 0.0067  | 0.0063  |
| Power       | binomial Bayesian       | -       | -       | 0.076   | 0.861   | -       | -       | 0.064   | 0.859   |
|             | normal Bayesian         | -       | -       | 0.049   | 0.875   | -       | -       | 0.064   | 0.87    |
|             | one-stage (frequentist) | -       | -       | 0.045   | 0.869   | -       | -       | 0.054   | 0.851   |
| Se2mean     | binomial Bayesian       | 0.007   | 0.0062  | 0.0049  | 0.0047  | 0.0071  | 0.0061  | 0.0049  | 0.0046  |
|             | normal Bayesian         | 0.0069  | 0.0063  | 0.005   | 0.0049  | 0.0071  | 0.0063  | 0.0051  | 0.0048  |
|             | one-stage (frequentist) | 0.0084  | 0.008   | 0.0063  | 0.0061  | 0.0087  | 0.0077  | 0.0061  | 0.0059  |
| MCse (bias) | binomial Bayesian       | 0.0024  | 0.0023  | 0.0021  | 0.0019  | 0.0025  | 0.0025  | 0.0022  | 0.0021  |
|             | normal Bayesian         | 0.0024  | 0.0023  | 0.0022  | 0.0021  | 0.0024  | 0.0026  | 0.0024  | 0.0023  |
|             | one-stage (frequentist) | 0.0026  | 0.0025  | 0.0024  | 0.0022  | 0.0026  | 0.0029  | 0.0024  | 0.0024  |
| $\sqrt{R}$  | binomial Bayesian       | 1.0061  | 1.0059  | 1.0058  | 1.0058  | 1.0058  | 1.0061  | 1.006   | 1.0058  |
|             | normal Bayesian         | 1.0039  | 1.0036  | 1.0033  | 1.0034  | 1.0037  | 1.0034  | 1.0033  | 1.003   |

Appendix Table 6 Assuming odds ratio (OR) as a measure of the treatment effect, 8 scenarios are simulated for a spline dose-response association with random effects coefficients. We assume 20 trials reporting aggregated-level data with three dose-levels each where sample size is generated from Unif(20, 100). The results for the common heterogeneity  $\tau$ .

| True $\tau$      |                   | 0.001  | 0.001  | 0.001  | 0.001  | 0.01   | 0.01   | 0.01   | 0.01   |
|------------------|-------------------|--------|--------|--------|--------|--------|--------|--------|--------|
| True $B_2$       |                   | 0      | 0      | 0.03   | -0.2   | 0      | 0      | 0.03   | -0.2   |
| True $B_1$       |                   | 0      | 0.04   | 0.1    | 0.2    | 0      | 0.04   | 0.1    | 0.2    |
| Bias             | binomial Bayesian | 0.0124 | 0.0118 | 0.0105 | 0.0108 | 0.0051 | 0.0044 | 0.0033 | 0.0037 |
|                  | normal Bayesian   | 0.013  | 0.0126 | 0.0116 | 0.0117 | 0.0055 | 0.0051 | 0.0041 | 0.0047 |
| Coverage         | binomial Bayesian | 0.938  | 0.934  | 0.956  | 0.942  | 0.982  | 0.977  | 0.975  | 0.986  |
|                  | normal Bayesian   | 0.914  | 0.906  | 0.907  | 0.906  | 0.981  | 0.975  | 0.971  | 0.964  |
| MSE              | binomial Bayesian | 0.0002 | 0.0002 | 0.0001 | 0.0001 | 0.0001 | 0.0001 | 0      | 0      |
|                  | normal Bayesian   | 0.0002 | 0.0002 | 0.0002 | 0.0002 | 0.0001 | 0.0001 | 0.0001 | 0.0001 |
| Power            | binomial Bayesian | 0.078  | 0.082  | 0.065  | 0.068  | 0.149  | 0.162  | 0.169  | 0.17   |
|                  | normal Bayesian   | 0.109  | 0.116  | 0.127  | 0.129  | 0.161  | 0.2    | 0.215  | 0.234  |
| Se2mean          | binomial Bayesian | 0.0001 | 0.0001 | 0.0001 | 0.0001 | 0.0001 | 0.0001 | 0.0001 | 0.0001 |
|                  | normal Bayesian   | 0.0001 | 0.0001 | 0.0001 | 0.0001 | 0.0001 | 0.0001 | 0.0001 | 0.0001 |
| MCse (bias)      | binomial Bayesian | 0.0002 | 0.0002 | 0.0001 | 0.0001 | 0.0002 | 0.0002 | 0.0002 | 0.0002 |
|                  | normal Bayesian   | 0.0002 | 0.0002 | 0.0002 | 0.0002 | 0.0002 | 0.0002 | 0.0002 | 0.0002 |
| $\sqrt{\bar{R}}$ | binomial Bayesian | 1.0208 | 1.0215 | 1.0199 | 1.0204 | 1.0198 | 1.0199 | 1.0211 | 1.0209 |
|                  | normal Bayesian   | 1.0147 | 1.015  | 1.0149 | 1.0155 | 1.0161 | 1.0148 | 1.0151 | 1.0171 |

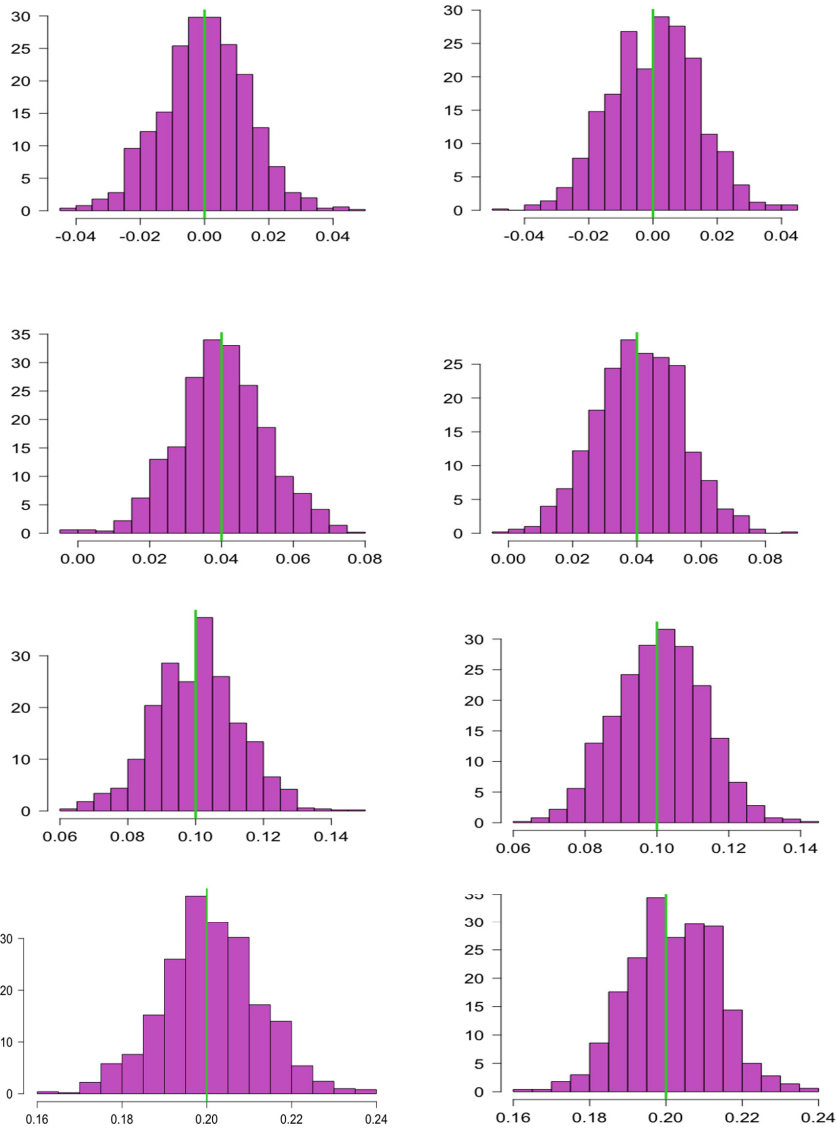

Appendix Figure 776 Histogram for  $\hat{B}_1$  in a simulation study based on odds ratio (OR) for the binomial dose-response meta-analysis model of restricted cubic spline in various scenarios for true  $B_2 =$  (a) 0 (b) 0 (c) 0.03 (d) -0.2 and true  $B_1 =$  (a) 0 (b) 0.04 (c) 0.1 (d) 0.2 (green line) where in the first and the second columns the true heterogeneity is set as  $\tau = 0.001$  and  $\tau = 0.01$ , respectively.

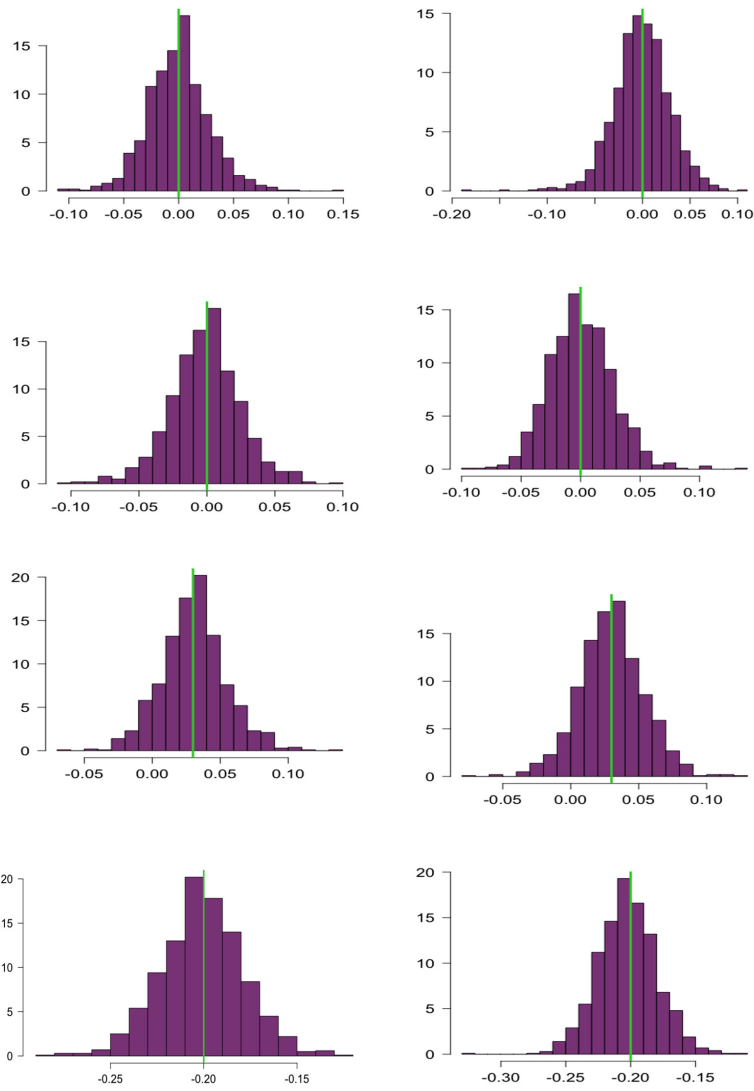

Appendix Figure 887 Histogram for  $\hat{B}_2$  in a simulation study based on odds ratio (OR) for the binomial dose-response meta-analysis model of restricted cubic spline in various scenarios for true  $B_2 =$  (a) 0 (b) 0 (c) 0.03 (d) -0.2 (green line) and true  $B_1 =$  (a) 0 (b) 0.04 (c) 0.1 (d) 0.2 where in the first and the second columns the true heterogeneity is set as  $\tau = 0.001$  and  $\tau = 0.01$ , respectively.

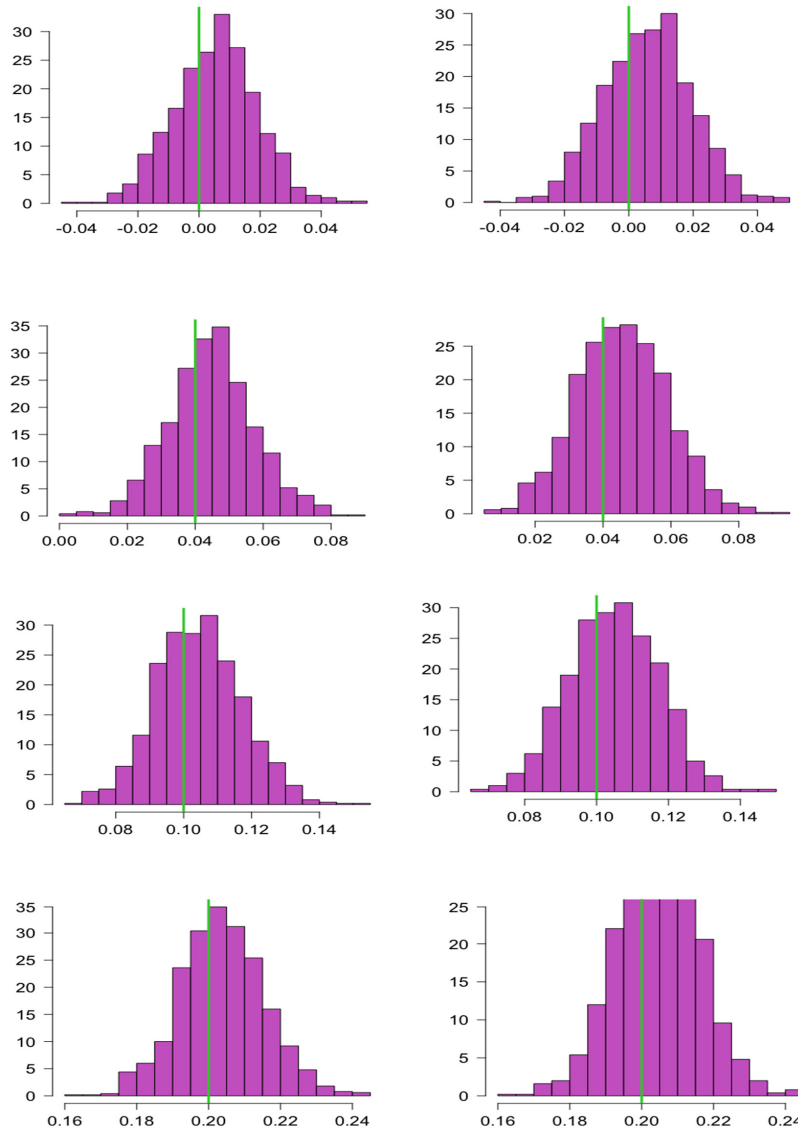

Appendix Figure 998 Histogram for  $\hat{B}_1$  in a simulation study based on odds ratio (OR) for the normal dose-response meta-analysis model of restricted cubic spline in various scenarios for true  $B_2 =$  (a) 0 (b) 0 (c) 0.03 (d) -0.2 and true  $B_1 =$  (a) 0 (b) 0.04 (c) 0.1 (d) 0.2 (green line) where in the first and the second columns the true heterogeneity is set as  $\tau = 0.001$  and  $\tau = 0.01$ , respectively.

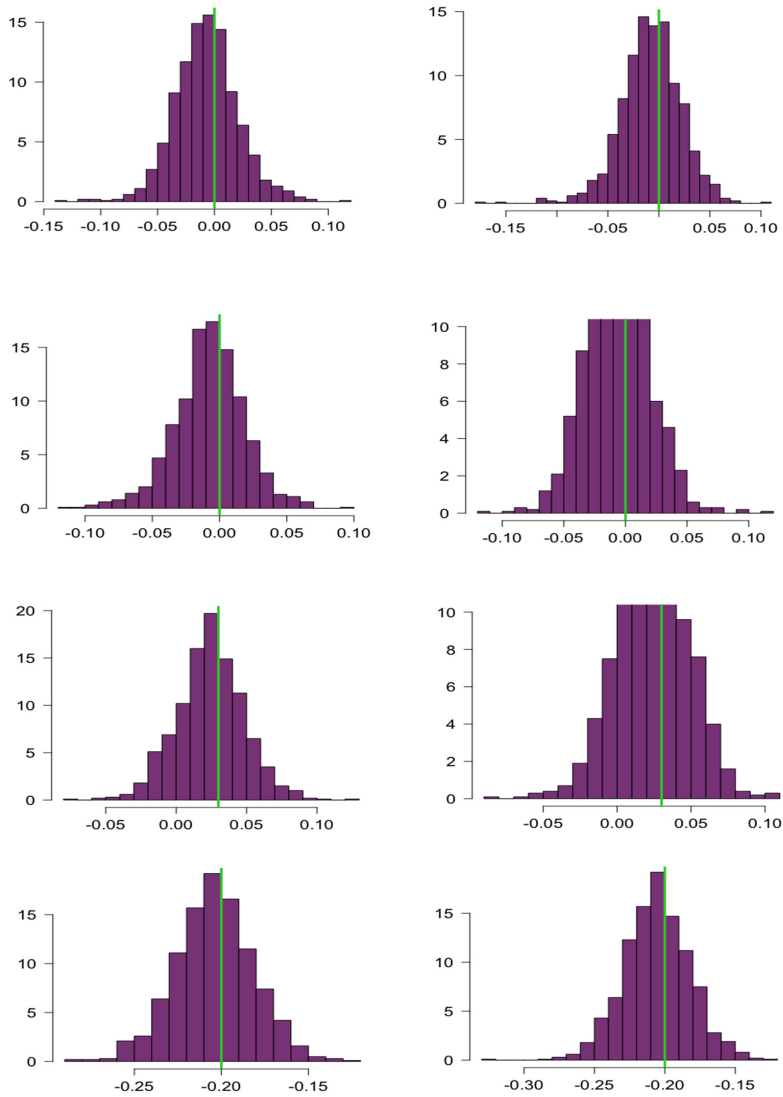

Appendix Figure 10409 Histogram for  $\hat{B}_2$  in a simulation study based on odds ratio (OR) for the normal dose-response meta-analysis model of restricted cubic spline in various scenarios for true  $B_2 =$  (a) 0 (b) 0 (c) 0.03 (d) -0.2 (green line) and true  $B_1 =$  (a) 0 (b) 0.04 (c) 0.1 (d) 0.2 where in the first and the second columns the true heterogeneity is set as  $\tau = 0.001$  and  $\tau = 0.01$ , respectively.



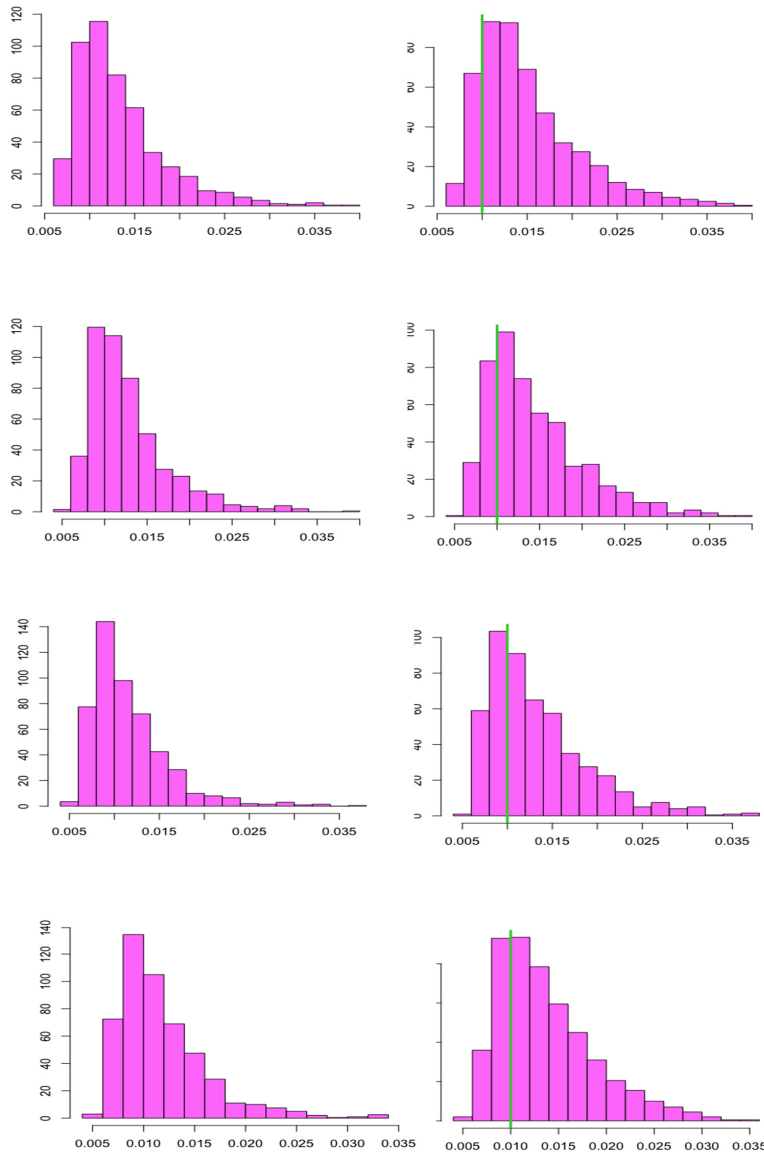

Appendix Figure 11410 Histogram for  $\hat{\tau}$  in a simulation study based on odds ratio (OR) for the binomial dose-response meta-analysis model of restricted cubic spline in various scenarios for true  $B_2 =$  (a) 0 (b) 0 (c) 0.03 (d) -0.2 and true  $B_1 =$  (a) 0 (b) 0.04 (c) 0.1 (d) 0.2 where in the first and the second columns the true heterogeneity is set as  $\tau = 0.001$  and  $\tau = 0.01$  (green line), respectively.

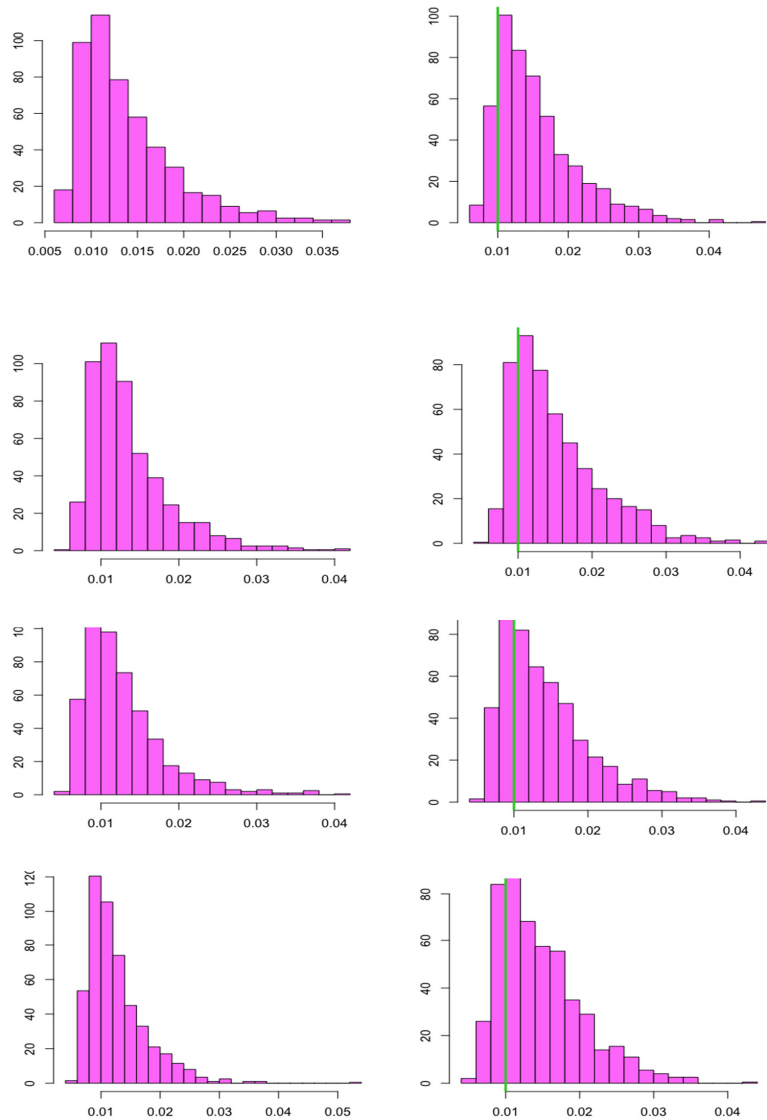

Appendix Figure 121214 Histogram for  $\hat{\tau}$  in a simulation study based on odds ratio (OR) for the normal dose-response meta-analysis model of restricted cubic spline in various scenarios for true  $B_2 =$  (a) 0 (b) 0 (c) 0.03 (d) -0.2 and true  $B_1 =$  (a) 0 (b) 0.04 (c) 0.1 (d) 0.2 where in the first and the second columns the true heterogeneity is set as  $\tau = 0.001$  and  $\tau = 0.01$  (green line), respectively.

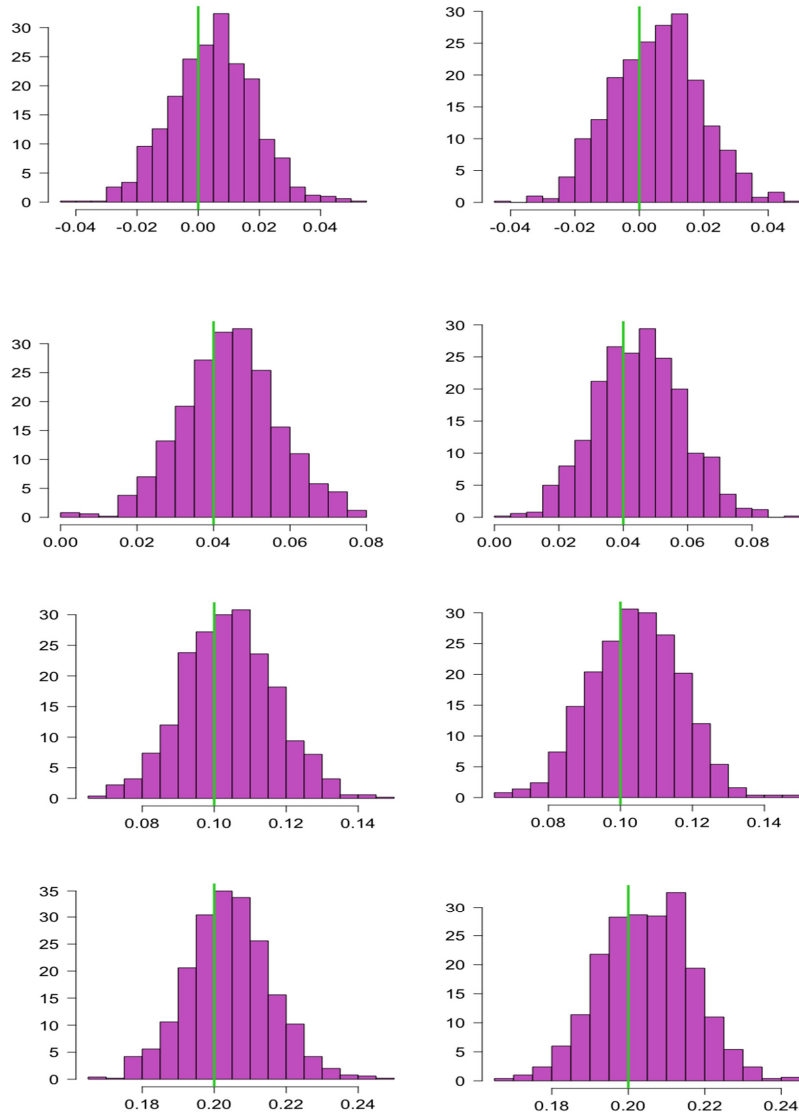

Appendix Figure 134312 Histogram for  $\hat{B}_1$  in a simulation study based on odds ratio (OR) for the one-stage (frequentist) dose-response meta-analysis model of restricted cubic spline in various scenarios for true  $B_2 =$  (a) 0 (b) 0 (c) 0.03 (d) -0.2 and true  $B_1 =$  (a) 0 (b) 0.04 (c) 0.1 (d) 0.2 (green line) where in the first and the second columns the true heterogeneity is set as  $\tau = 0.001$  and  $\tau = 0.01$ , respectively.

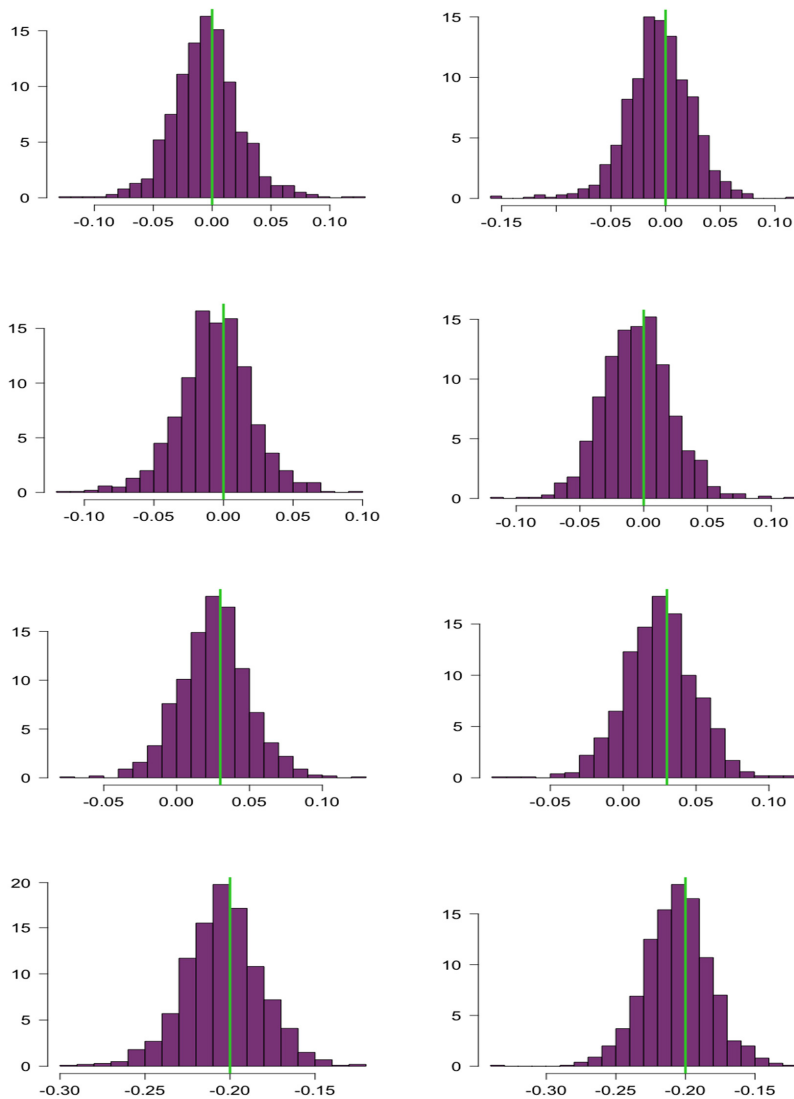

Appendix Figure 14413 Histogram for  $\hat{\beta}_2$  in a simulation study based on odds ratio (OR) for the one-stage (frequentist) dose-response meta-analysis model of restricted cubic spline in various scenarios for true  $\beta_2 =$  (a) 0 (b) 0 (c) 0.03 (d) -0.2 (green line) and true  $\beta_1 =$  (a) 0 (b) 0.04 (c) 0.1 (d) 0.2 where in the first and the second columns the true heterogeneity is set as  $\tau = 0.001$  and  $\tau = 0.01$ , respectively.

## 2. Results from simulations on RR

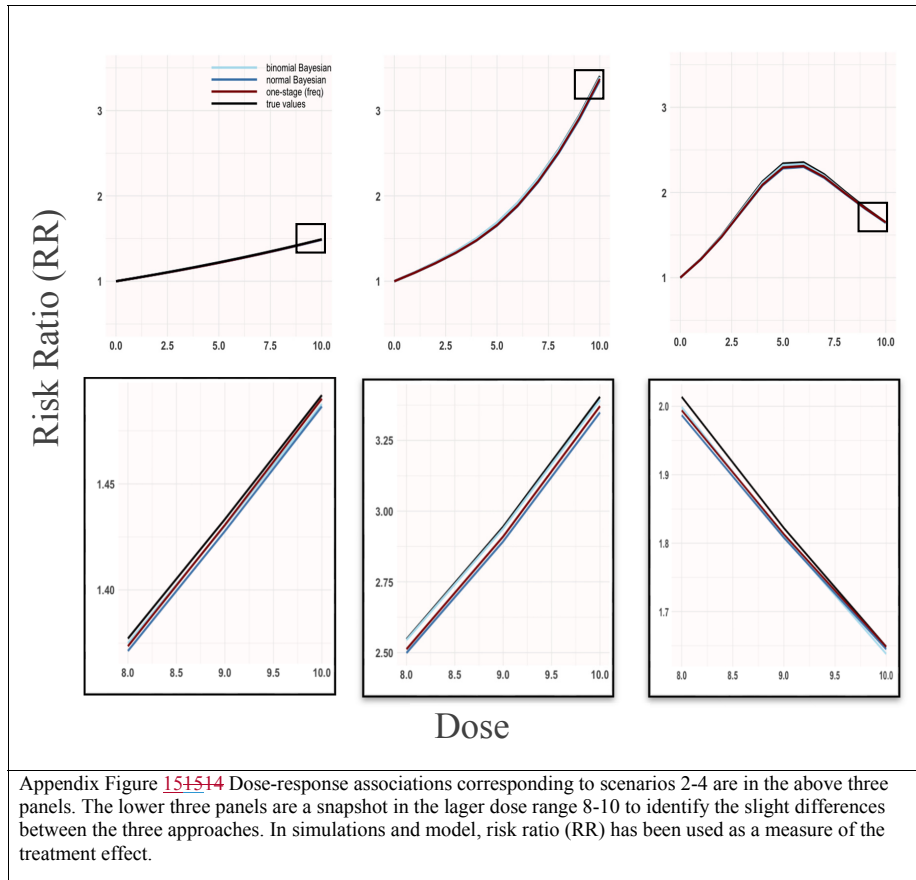

Appendix Figure 151514 Dose-response associations corresponding to scenarios 2-4 are in the above three panels. The lower three panels are a snapshot in the larger dose range 8-10 to identify the slight differences between the three approaches. In simulations and model, risk ratio (RR) has been used as a measure of the treatment effect.

Appendix Table 7 Assuming risk ratio (RR) as a measure of the treatment effect, 8 scenarios are simulated for a spline dose-response association with random effects coefficients. We assume 40 trials reporting aggregated-level data with three dose-levels each. The results for the linear coefficient  $B_1$ .

| True $B_1$  |                         | 0      | 0.04   | 0.1     | 0.2     | 0      | 0.04    | 0.1     | 0.2     |
|-------------|-------------------------|--------|--------|---------|---------|--------|---------|---------|---------|
| True $\tau$ |                         | 0.001  | 0.001  | 0.001   | 0.001   | 0.01   | 0.01    | 0.01    | 0.01    |
| Bias        | binomial Bayesian       | 0      | 0.0001 | 0.0005  | -0.0018 | 0.0006 | 0       | 0.0008  | 0.0004  |
|             | normal Bayesian         | 0.0001 | -0.001 | -0.0047 | -0.006  | 0.0002 | -0.0017 | -0.0067 | -0.0059 |
|             | one-stage (frequentist) | 0      | -0.001 | -0.004  | -0.0049 | 0.0002 | -0.0015 | -0.0055 | -0.0044 |
| Coverage    | binomial Bayesian       | 0.952  | 0.952  | 0.932   | 0.913   | 0.943  | 0.948   | 0.962   | 0.96    |
|             | normal Bayesian         | 0.904  | 0.908  | 0.853   | 0.79    | 0.915  | 0.904   | 0.866   | 0.815   |
|             | one-stage (frequentist) | 0.95   | 0.939  | 0.9     | 0.857   | 0.938  | 0.927   | 0.916   | 0.896   |
| MSE         | binomial Bayesian       | 0      | 0      | 0.0001  | 0.0001  | 0      | 0       | 0.0001  | 0       |
|             | normal Bayesian         | 0      | 0      | 0.0001  | 0.0001  | 0      | 0.0001  | 0.0002  | 0.0001  |
|             | one-stage (frequentist) | 0      | 0      | 0.0001  | 0.0001  | 0      | 0.0001  | 0.0002  | 0.0001  |
| Power       | binomial Bayesian       | -      | 1      | 1       | 1       | -      | 1       | 1       | 1       |
|             | normal Bayesian         | -      | 1      | 1       | 1       | -      | 0.996   | 1       | 1       |
|             | one-stage (frequentist) | -      | 1      | 1       | 1       | -      | 0.993   | 1       | 1       |
| Se2mean     | binomial Bayesian       | 0      | 0      | 0.0001  | 0       | 0      | 0       | 0.0001  | 0       |
|             | normal Bayesian         | 0      | 0      | 0.0001  | 0       | 0      | 0.0001  | 0.0001  | 0.0001  |
|             | one-stage (frequentist) | 0      | 0      | 0.0001  | 0.0001  | 0      | 0.0001  | 0.0001  | 0.0001  |
| MCse (bias) | binomial Bayesian       | 0.0001 | 0.0002 | 0.0003  | 0.0003  | 0.0002 | 0.0002  | 0.0003  | 0.0002  |
|             | normal Bayesian         | 0.0002 | 0.0002 | 0.0004  | 0.0003  | 0.0002 | 0.0003  | 0.0004  | 0.0003  |
|             | one-stage (frequentist) | 0.0002 | 0.0002 | 0.0003  | 0.0003  | 0.0002 | 0.0003  | 0.0004  | 0.0003  |
| $\sqrt{R}$  | binomial Bayesian       | 1.0078 | 1.009  | 1.0086  | 1.0074  | 1.0036 | 1.0049  | 1.0066  | 1.0042  |
|             | normal Bayesian         | 1.0021 | 1.0026 | 1.0026  | 1.0018  | 1.0018 | 1.0021  | 1.0023  | 1.0016  |

Appendix Table 8 Assuming risk ratio (RR) as a measure of the treatment effect, 8 scenarios are simulated for a spline dose-response association with random effects coefficients. We assume 40 trials reporting aggregated-level data with three dose-levels each. The results for the spline coefficient  $B_2$ .

| True $B_2$       |                         | 0       | 0       | 0.03    | -0.2   | 0       | 0      | 0.03    | -0.2   |
|------------------|-------------------------|---------|---------|---------|--------|---------|--------|---------|--------|
| True $\tau$      |                         | 0.001   | 0.001   | 0.001   | 0.001  | 0.01    | 0.01   | 0.01    | 0.01   |
| Bias             | binomial Bayesian       | -0.0003 | -0.0005 | -0.0011 | 0.0015 | -0.0004 | 0.0004 | -0.0002 | 0      |
|                  | normal Bayesian         | -0.0004 | 0.0009  | 0.0041  | 0.0077 | 0       | 0.0019 | 0.0073  | 0.0094 |
|                  | one-stage (frequentist) | 0.0001  | 0.0011  | 0.0041  | 0.0065 | 0.0001  | 0.0021 | 0.0064  | 0.0076 |
| Coverage         | binomial Bayesian       | 0.957   | 0.957   | 0.953   | 0.911  | 0.941   | 0.955  | 0.964   | 0.954  |
|                  | normal Bayesian         | 0.825   | 0.809   | 0.789   | 0.708  | 0.849   | 0.838  | 0.807   | 0.719  |
|                  | one-stage (frequentist) | 0.914   | 0.922   | 0.907   | 0.872  | 0.921   | 0.909  | 0.909   | 0.879  |
| MSE              | binomial Bayesian       | 0.0001  | 0.0001  | 0.0002  | 0.0002 | 0.0001  | 0.0002 | 0.0003  | 0.0002 |
|                  | normal Bayesian         | 0.0002  | 0.0003  | 0.0008  | 0.0006 | 0.0003  | 0.0005 | 0.001   | 0.0009 |
|                  | one-stage (frequentist) | 0.0002  | 0.0003  | 0.0008  | 0.0005 | 0.0003  | 0.0004 | 0.001   | 0.0008 |
| Power            | binomial Bayesian       | -       | -       | 0.544   | 1      | -       | -      | 0.424   | 1      |
|                  | normal Bayesian         | -       | -       | 0.544   | 0.998  | -       | -      | 0.487   | 0.999  |
|                  | one-stage (frequentist) | -       | -       | 0.402   | 1      | -       | -      | 0.312   | 0.995  |
| Se2mean          | binomial Bayesian       | 0.0001  | 0.0001  | 0.0002  | 0.0001 | 0.0001  | 0.0002 | 0.0003  | 0.0002 |
|                  | normal Bayesian         | 0.0001  | 0.0001  | 0.0003  | 0.0002 | 0.0002  | 0.0002 | 0.0004  | 0.0003 |
|                  | one-stage (frequentist) | 0.0002  | 0.0002  | 0.0006  | 0.0004 | 0.0003  | 0.0004 | 0.0008  | 0.0005 |
| MCse (bias)      | binomial Bayesian       | 0.0003  | 0.0003  | 0.0005  | 0.0004 | 0.0004  | 0.0004 | 0.0006  | 0.0004 |
|                  | normal Bayesian         | 0.0005  | 0.0006  | 0.0009  | 0.0007 | 0.0006  | 0.0007 | 0.001   | 0.0009 |
|                  | one-stage (frequentist) | 0.0005  | 0.0005  | 0.0009  | 0.0007 | 0.0006  | 0.0007 | 0.001   | 0.0009 |
| $\sqrt{\bar{R}}$ | binomial Bayesian       | 1.0094  | 1.0104  | 1.0096  | 1.0086 | 1.0043  | 1.0055 | 1.0074  | 1.0048 |
|                  | normal Bayesian         | 1.0026  | 1.0031  | 1.003   | 1.0021 | 1.0021  | 1.0025 | 1.0027  | 1.0018 |

Appendix Table 9 Assuming risk ratio (RR) as a measure of the treatment effect, 8 scenarios are simulated for a spline dose-response association with random effects coefficients. We assume 40 trials reporting aggregated-level data with three dose-levels each. The results for the common heterogeneity  $\tau$ .

| True $\tau$      |                   | 0.001  | 0.001  | 0.001  | 0.001  | 0.01    | 0.01    | 0.01   | 0.01   |
|------------------|-------------------|--------|--------|--------|--------|---------|---------|--------|--------|
| True $B_2$       |                   | 0      | 0      | 0.03   | -0.2   | 0       | 0       | 0.03   | -0.2   |
| True $B_1$       |                   | 0      | 0.04   | 0.1    | 0.2    | 0       | 0.04    | 0.1    | 0.2    |
| Bias             | binomial Bayesian | 0.0032 | 0.004  | 0.0063 | 0.0051 | -0.0002 | -0.0001 | 0.0015 | 0.0003 |
|                  | normal Bayesian   | 0.0086 | 0.0096 | 0.0158 | 0.0154 | 0.0041  | 0.0049  | 0.0106 | 0.0107 |
| Coverage         | binomial Bayesian | 0.969  | 0.966  | 0.963  | 0.919  | 0.967   | 0.967   | 0.991  | 0.974  |
|                  | normal Bayesian   | 0.369  | 0.468  | 0.372  | 0.212  | 0.836   | 0.801   | 0.683  | 0.544  |
| MSE              | binomial Bayesian | 0      | 0      | 0      | 0.0001 | 0       | 0       | 0      | 0      |
|                  | normal Bayesian   | 0.0001 | 0.0001 | 0.0003 | 0.0003 | 0       | 0.0001  | 0.0002 | 0.0002 |
| Power            | binomial Bayesian | 0.08   | 0.078  | 0.071  | 0.129  | 0.616   | 0.44    | 0.267  | 0.47   |
|                  | normal Bayesian   | 0.716  | 0.622  | 0.687  | 0.828  | 0.834   | 0.752   | 0.707  | 0.889  |
| Se2mean          | binomial Bayesian | 0      | 0      | 0      | 0      | 0       | 0       | 0      | 0      |
|                  | normal Bayesian   | 0      | 0      | 0      | 0      | 0       | 0       | 0.0001 | 0      |
| MCse (bias)      | binomial Bayesian | 0      | 0.0001 | 0.0001 | 0.0002 | 0.0001  | 0.0001  | 0.0001 | 0.0001 |
|                  | normal Bayesian   | 0.0001 | 0.0001 | 0.0002 | 0.0002 | 0.0002  | 0.0002  | 0.0003 | 0.0002 |
| $\sqrt{\bar{R}}$ | binomial Bayesian | 1.0202 | 1.0205 | 1.0178 | 1.019  | 1.0204  | 1.0202  | 1.0211 | 1.0221 |
|                  | normal Bayesian   | 1.0163 | 1.0171 | 1.0164 | 1.014  | 1.0141  | 1.0154  | 1.016  | 1.0102 |



### 3. Further results for dose-response meta-analysis analysis of antidepressants.

Appendix Table 10 Results of the three approaches regarding the estimation of linear and spline coefficients  $B_1$  and  $B_2$ , respectively, in addition to their common heterogeneity  $\tau$ . These results are based on simulated antidepressant dataset from restricted cubic spline dose-response meta-analysis model, the coefficients are set as the frequentist estimation that are displayed in Table 3.

|        | True    | binomial Bayesian |        | normal Bayesian |        | One-stage (frequentist) |        |
|--------|---------|-------------------|--------|-----------------|--------|-------------------------|--------|
|        |         | Mean              | SD     | Mean            | SD     | Mean                    | SE     |
| $B_1$  | 0.0209  | 0.0212            | 0.0022 | 0.0215          | 0.0022 | 0.0214                  | 0.0023 |
| $B_2$  | -0.0376 | -0.0375           | 0.0051 | -0.0376         | 0.0050 | -0.0374                 | 0.0052 |
| $\tau$ | 0.0071  | 0.0073            | 0.0014 | 0.0070          | 0.0014 | -                       | -      |

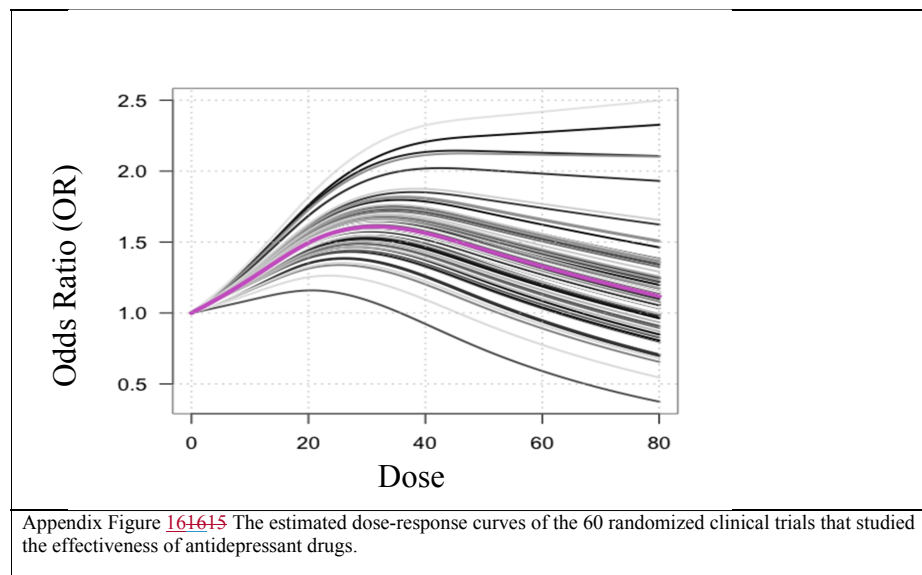

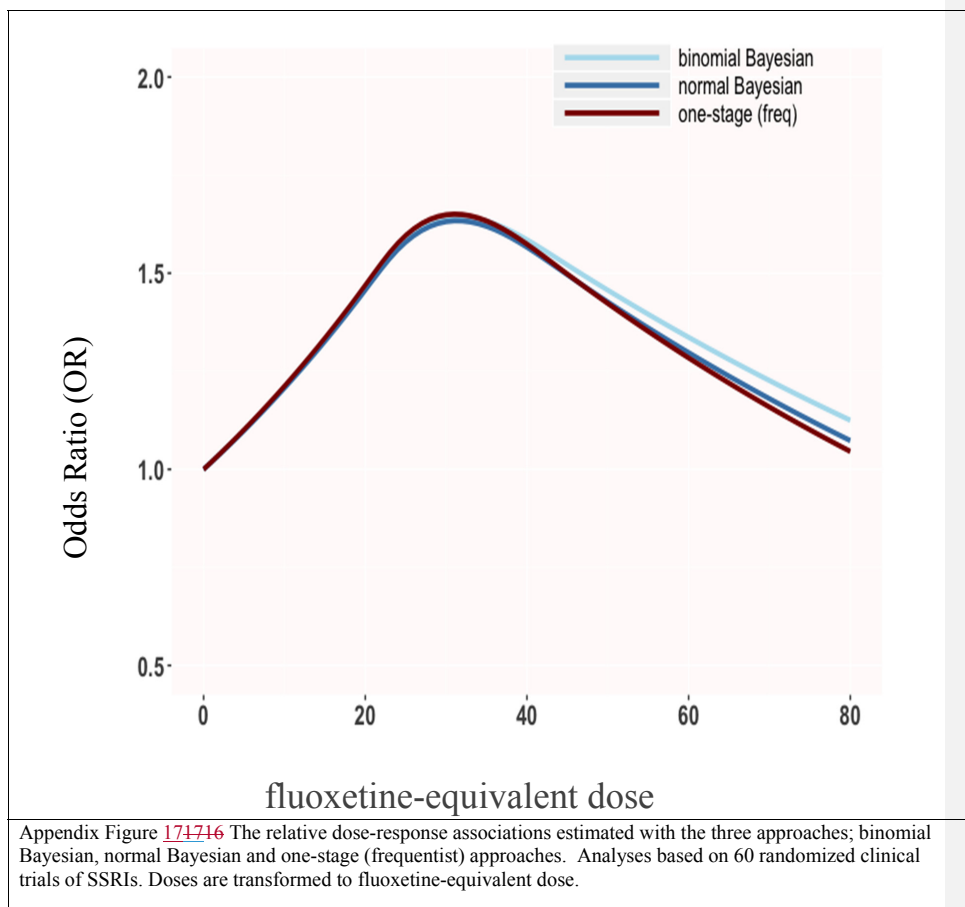

#### 4. CODA for dose-response meta-analysis of antidepressants

In R, *coda* package is used to perform MCMC convergence diagnosis and produce the proceeding results.

**Histogram:** it presents the density of the estimated parameters.

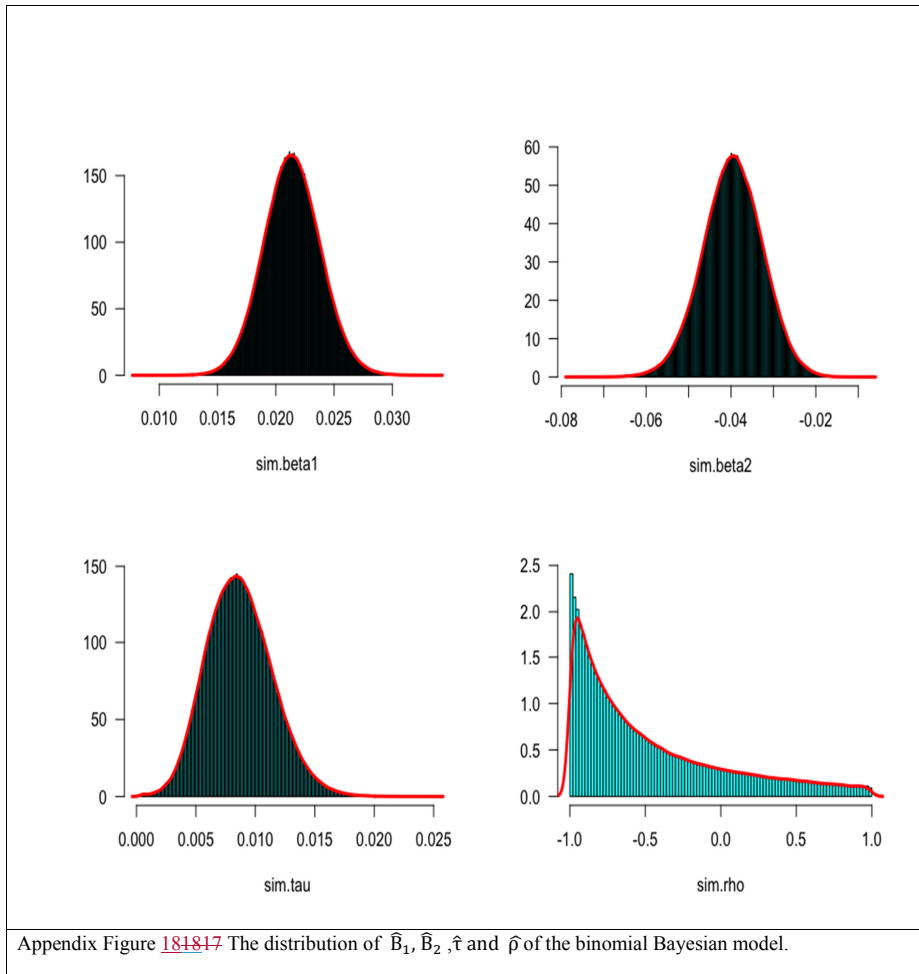

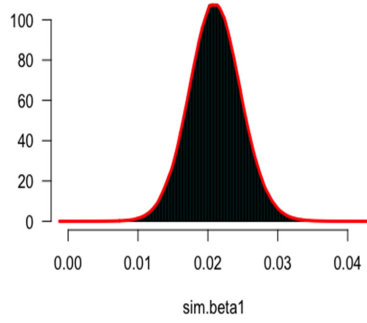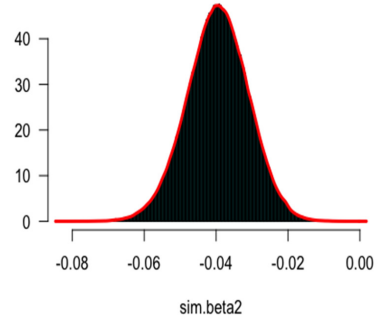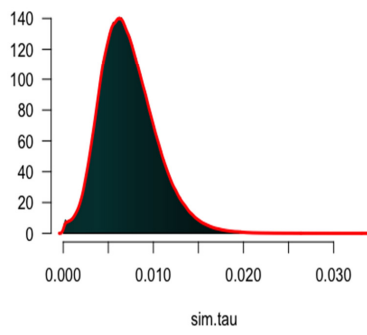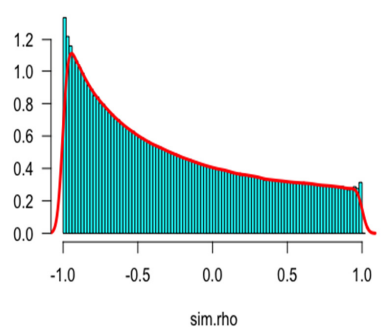

Appendix Figure 191918 The distribution of  $\hat{\beta}_1$ ,  $\hat{\beta}_2$ ,  $\hat{\tau}$  and  $\hat{\rho}$  of the normal Bayesian model.

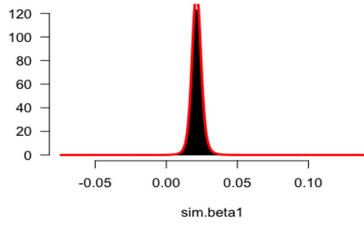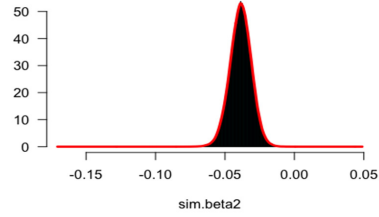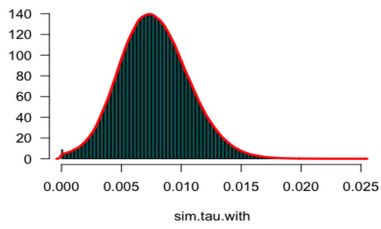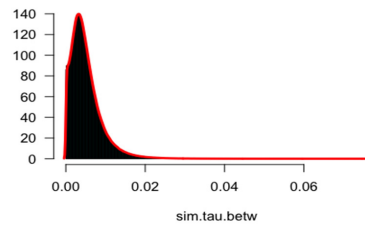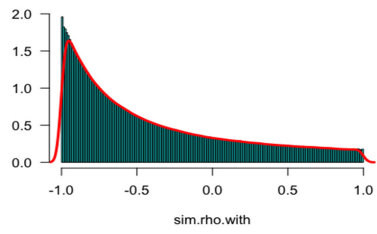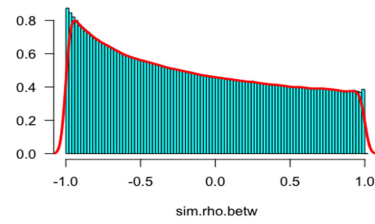

Appendix Figure 202019 The distribution of  $\hat{B}_1, \hat{B}_2, \hat{\tau}_{\text{within}}, \hat{\tau}_{\text{between}}, \hat{\rho}_{\text{within}}$  and  $\hat{\rho}_{\text{between}}$  of the binomial Bayesian model with drug-specific class.

**Trace plots:** this plot is used to diagnose the convergence and mixing of MCMC. We notice that, as iterations increase, the estimations depart from the starting value. Additionally, the different chains are well mixed (overlapped). For SSRIs, the MCMC satisfy convergence and chains are well mixed.

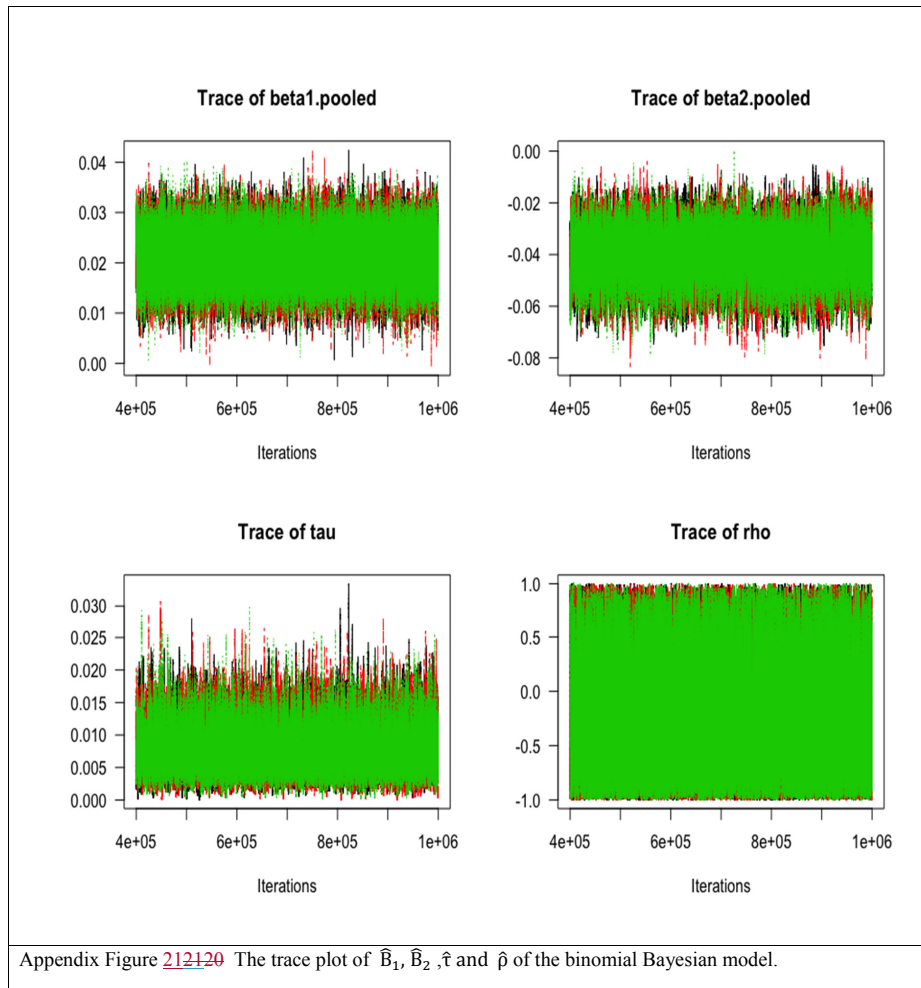

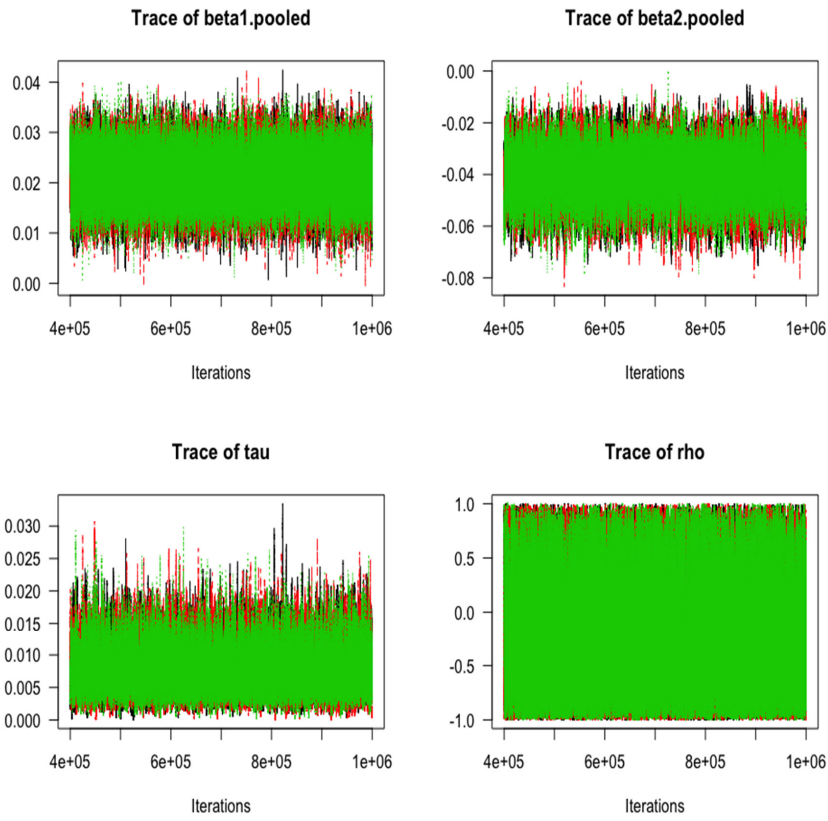

Appendix Figure 232323 The trace plot of  $\hat{\beta}_1$ ,  $\hat{\beta}_2$ ,  $\hat{\tau}$  and  $\hat{\rho}$  of the normal Bayesian model of the binomial Bayesian model with drug-specific class.

**Geweke plot:** it is used to examine the stationary property of every chain. To do that, it is started by divide the chain into two parts; first and last part, then compare the means in both parts. In the plot, in the x-axis, the number of iterations in the first part is varied. In y-axis, the Z-score is displayed as the standard normal score which quantify the difference in means in the two parts. The chain is stationary if the difference in means is ‘statistically’ equal zero. In other words, in 5% level of significance, if the points lay within -1.96 and 1.96 (the dashed lines) then there is no evidence that means are different. In SSRIs analysis, we notice that most of dots lay within the dash lines, this means that, overall, no evidence of differences in means and thus the chains are stationary.

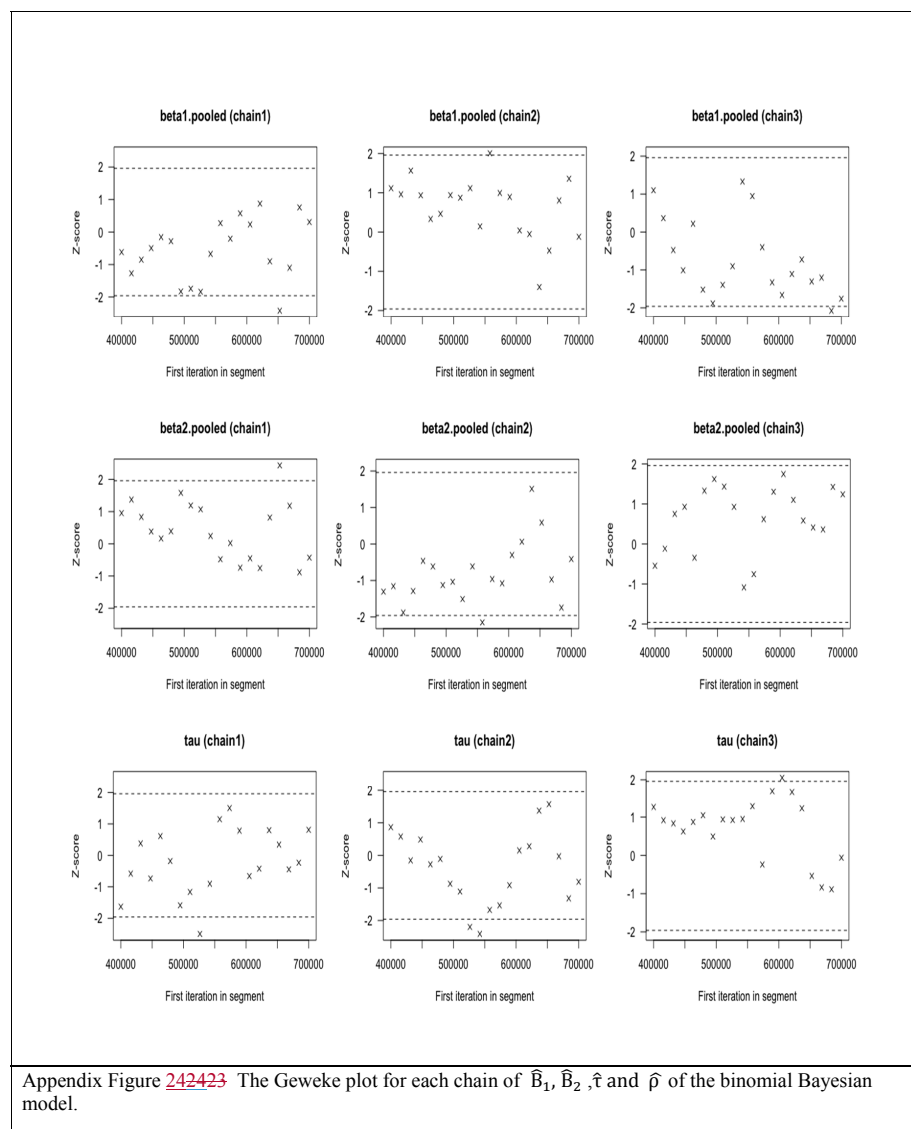

Appendix Figure 242423 The Geweke plot for each chain of  $\hat{B}_1$ ,  $\hat{B}_2$ ,  $\hat{\tau}$  and  $\hat{\rho}$  of the binomial Bayesian model.



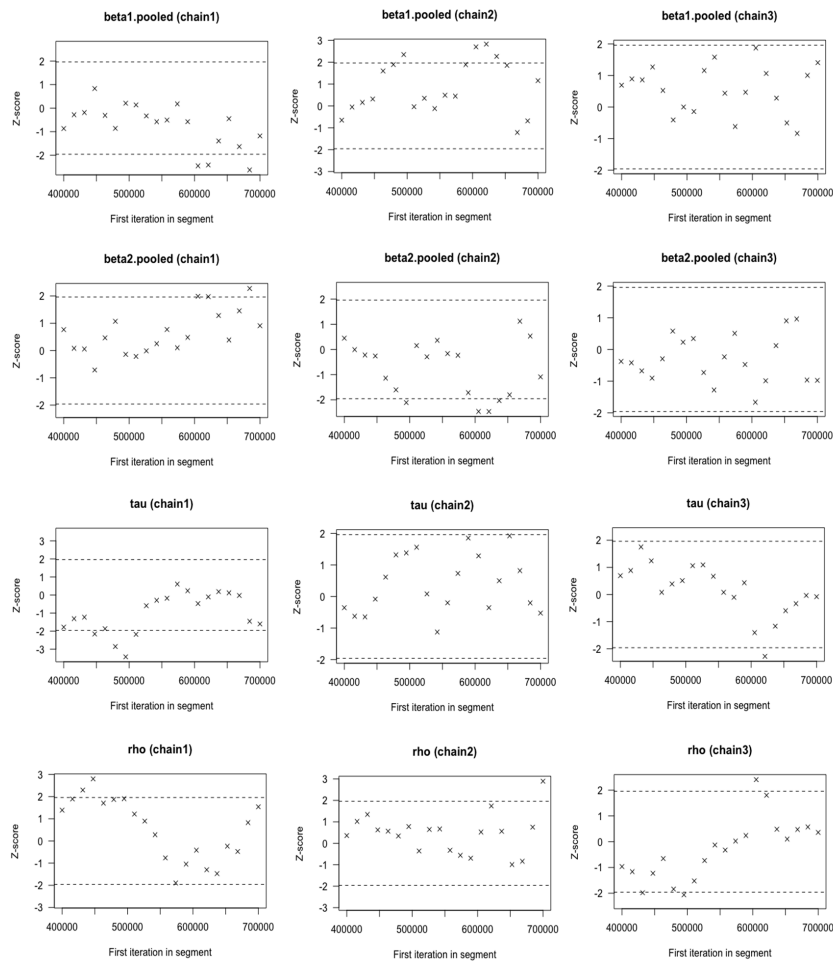

Appendix Figure 252524 The Geweke plot for each chain of  $\hat{B}_1$ ,  $\hat{B}_2$ ,  $\hat{\tau}$  and  $\hat{\rho}$  of the normal Bayesian model.

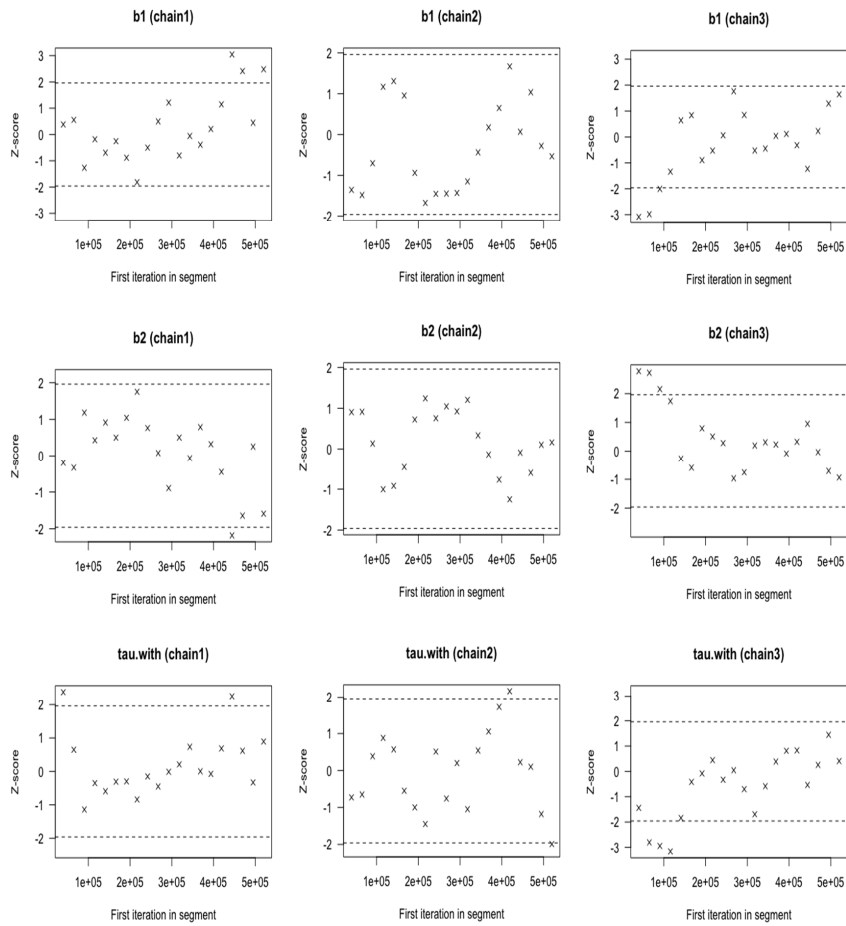

Appendix Figure 262625 The Geweke plot for each chain of  $\hat{B}_1$ ,  $\hat{B}_2$  and  $\hat{\tau}_{\text{within}}$  of the binomial Bayesian model with drug-specific class.

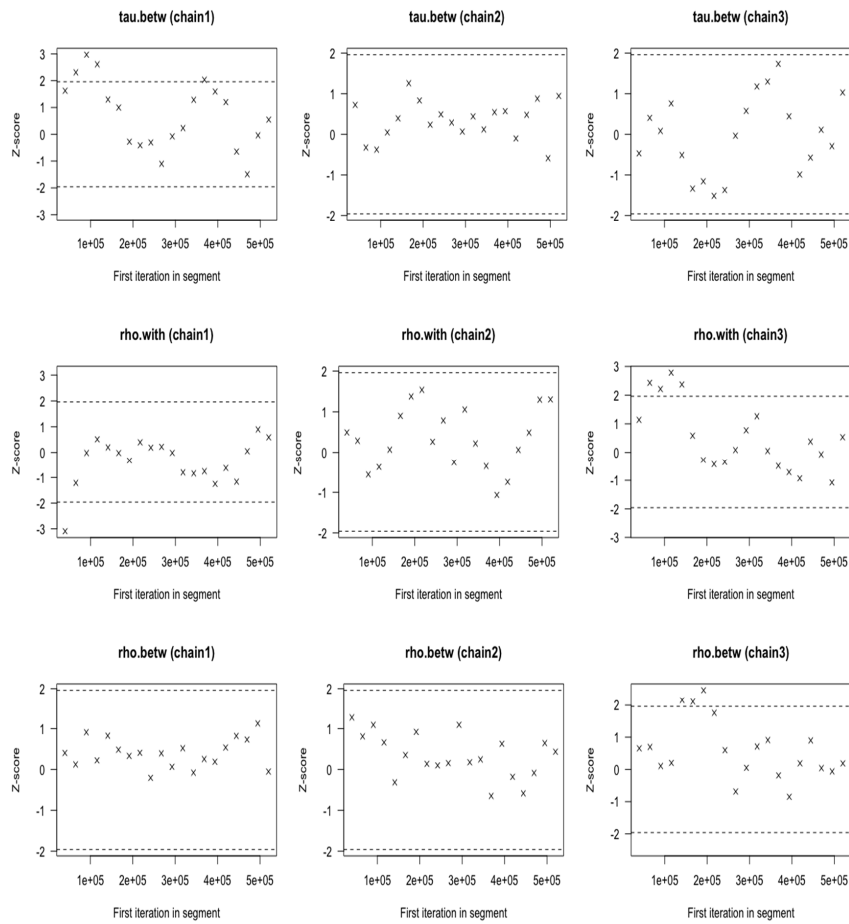

Appendix Figure 272726 The Geweke plot for each chain  $\hat{\tau}_{\text{betw}}$ ,  $\hat{\rho}_{\text{with}}$  and  $\hat{\rho}_{\text{betw}}$  of the binomial Bayesian model with drug-specific class.

**Gelman-Rubin plot:** The shrink factor ( $\sqrt{\hat{R}}$ ) is the ratio between the within- and between-chains variances. In y-axis, the 50% and 97.5% quantiles of the shrink factor empirical distribution is presented. In x-axis, the number of iterations that are used in the estimation in the last part of the chain is set. The convergence of MCMC is satisfied when  $\sqrt{\hat{R}}$  approaches 1 as number of iterations increase. In our SSRIs analysis, overall, the shrink factor converges to 1, thus the convergence is satisfied.

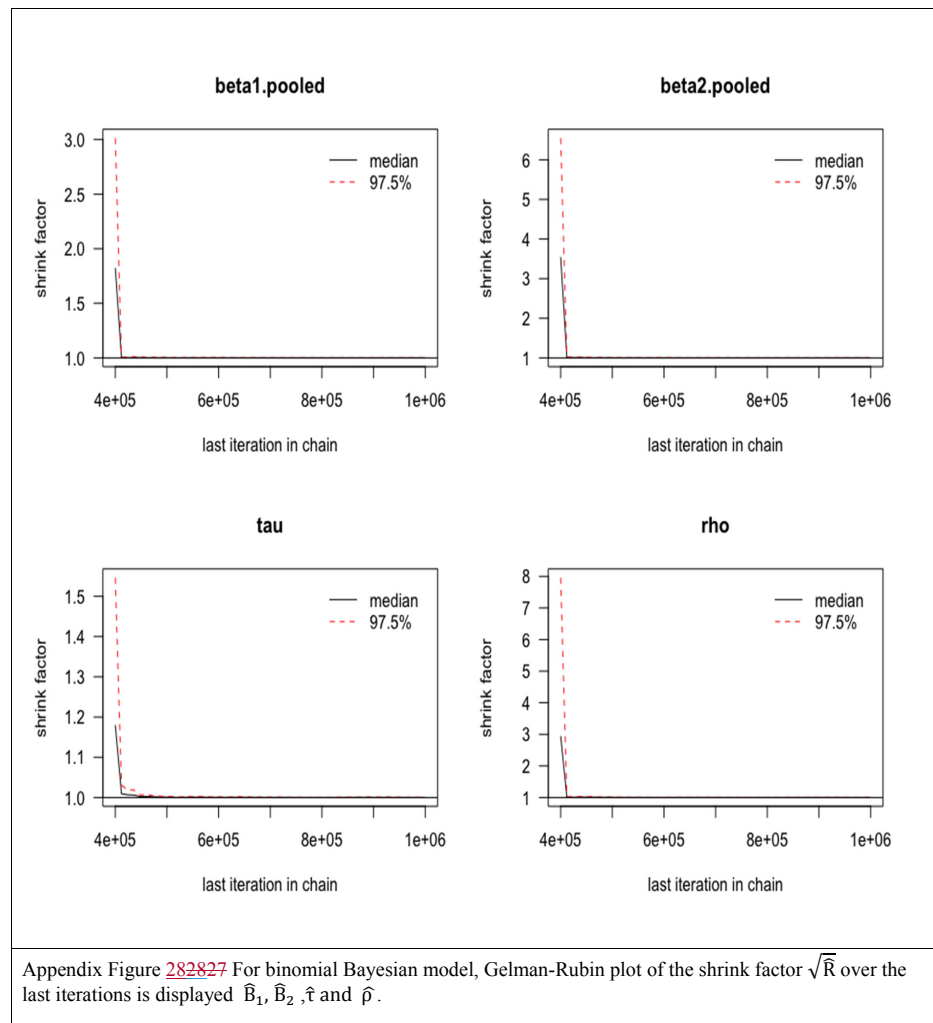

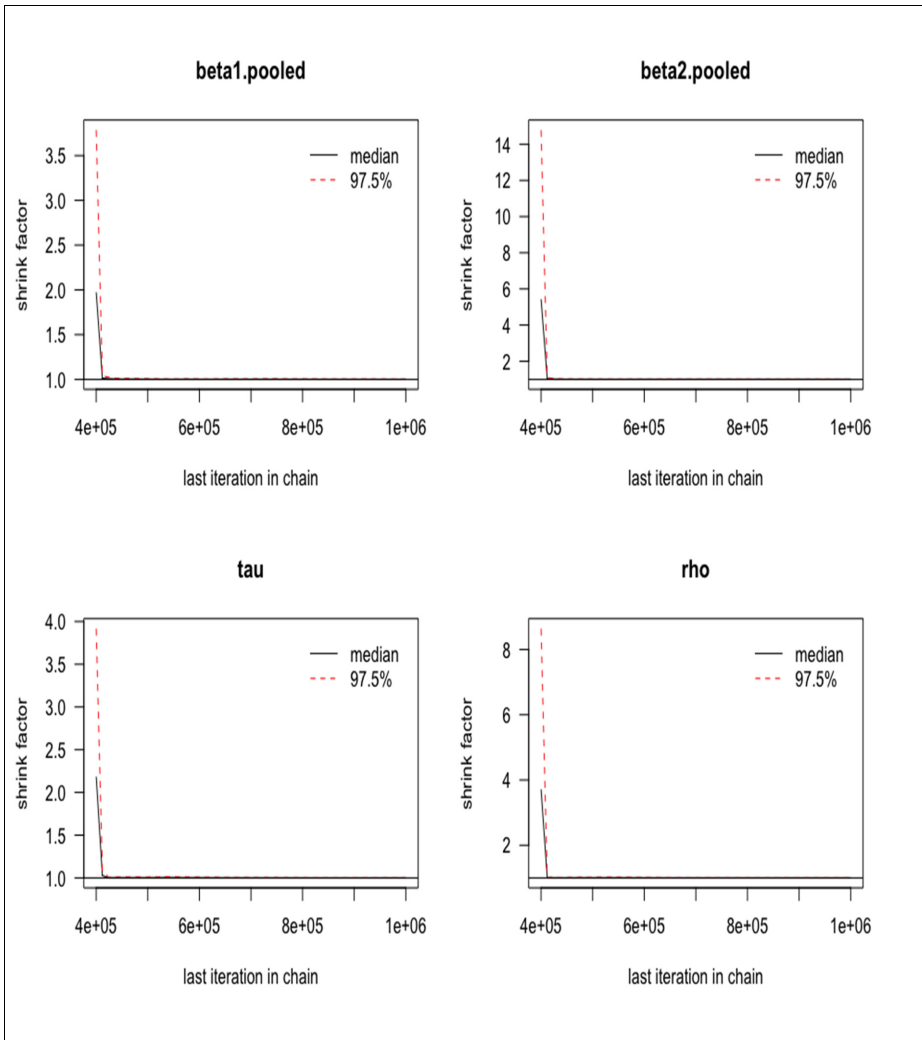

Appendix Figure 292928 For normal Bayesian model, Gelman-Rubin plot of the shrink factor  $\sqrt{\hat{R}}$  over the last iterations is displayed  $\hat{\beta}_1$ ,  $\hat{\beta}_2$ ,  $\hat{\tau}$  and  $\hat{\rho}$ .

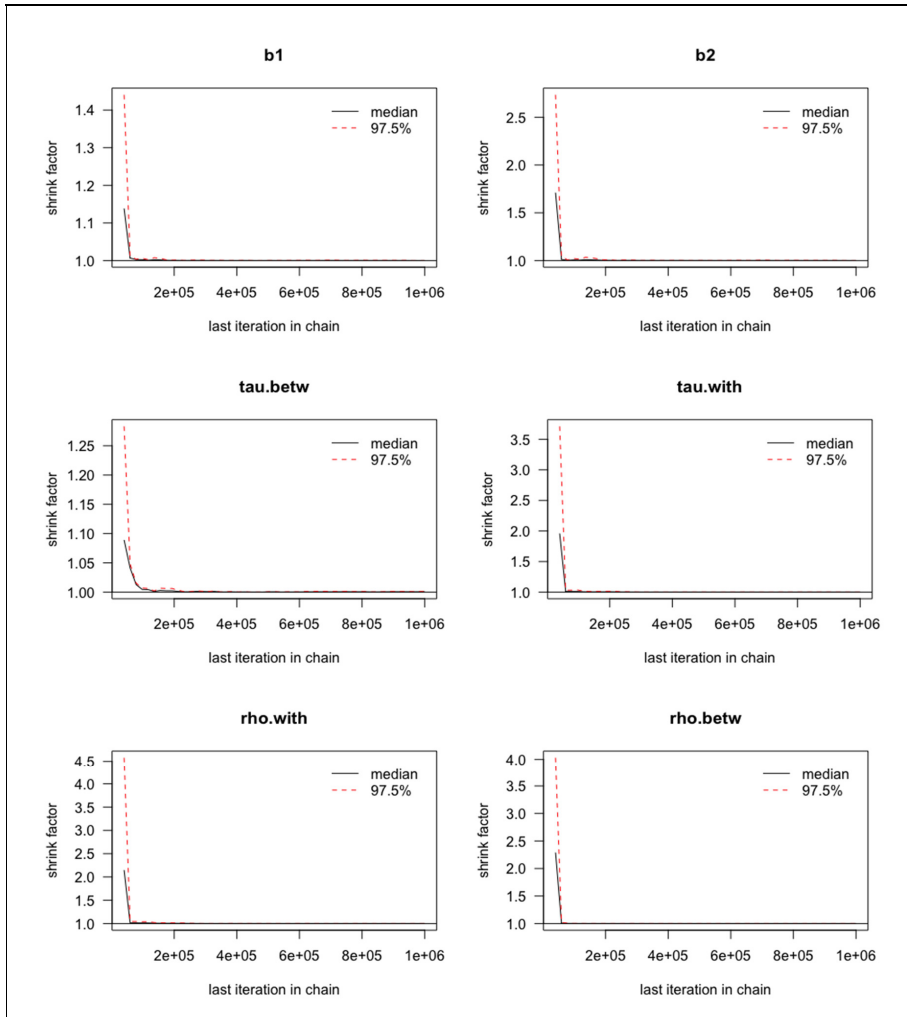

Appendix Figure 303029 For binomial Bayesian model with drug-specific class, Gelman-Rubin plot of the shrink factor  $\sqrt{\hat{R}}$  over the iterations is displayed for  $\hat{B}_1$ ,  $\hat{B}_2$ ,  $\hat{\tau}_{within}$ ,  $\hat{\tau}_{between}$ ,  $\hat{\rho}_{within}$  and  $\hat{\rho}_{between}$ .

**Raftery and Lewis:** the approach is used to estimate the least number of iterations and number of burn-in that are required to estimate the corresponding parameter within specific precision, say %95. Additionally, the dependence factor I is computed which measures how many times the number of iterations need to be increased to achieve the convergence. Larger values of I reflects large within chain correlations. For SSRIs analysis, to meet the least estimated numbers, we have run 1'000'000 iterations with 400'000 burn-in.

Appendix Table 11 For binomial Bayesian model, the estimated number of burn-in, number of iterations and I factor on each chain is presented

|        | Chain 1    |         |          | Chain 2    |         |          | Chain 3    |         |          |
|--------|------------|---------|----------|------------|---------|----------|------------|---------|----------|
|        | n. burn-in | n. iter | I factor | n. burn-in | n. iter | I factor | n. burn-in | n. iter | I factor |
| $B_1$  | 66         | 98758   | 26.4     | 69         | 101085  | 27       | 75         | 101875  | 27.2     |
| $B_2$  | 195        | 219297  | 58.5     | 170        | 193324  | 51.6     | 190        | 220894  | 59       |
| $\tau$ | 276        | 320666  | 85.6     | 328        | 371214  | 99.1     | 280        | 312240  | 83.4     |
| $\rho$ | 315        | 354555  | 94.6     | 441        | 535248  | 143      | 315        | 347625  | 92.8     |

Appendix Table 12 For normal Bayesian model, the estimated number of burn-in, number of iterations and I factor on each chain is presented.

|        | Chain 1    |         |          | Chain 2    |         |          | Chain 3    |         |          |
|--------|------------|---------|----------|------------|---------|----------|------------|---------|----------|
|        | n. burn-in | n. iter | I factor | n. burn-in | n. iter | I factor | n. burn-in | n. iter | I factor |
| $B_1$  | 148        | 175602  | 46.9     | 204        | 248268  | 66.3     | 132        | 154440  | 41.2     |
| $B_2$  | 228        | 264024  | 70.5     | 320        | 347968  | 92.2     | 282        | 329893  | 88.1     |
| $\tau$ | 576        | 640064  | 171      | 704        | 797544  | 213      | 490        | 515529  | 138      |
| $\rho$ | 392        | 463981  | 124      | 399        | 442776  | 118      | 376        | 389019  | 104      |

Appendix Table 13 For binomial Bayesian model with drug-specific class, the estimated number of burn-in, number of iterations and I factor on each chain is presented.

|                  | Chain 1    |         |          | Chain 2    |         |          | Chain 3    |         |          |
|------------------|------------|---------|----------|------------|---------|----------|------------|---------|----------|
|                  | n. burn-in | n. iter | I factor | n. burn-in | n. iter | I factor | n. burn-in | n. iter | I factor |
| $B_1$            | 63         | 86814   | 23.2     | 69         | 93840   | 25.1     | 90         | 124020  | 33.1     |
| $B_2$            | 284        | 360609  | 96.3     | 290        | 348638  | 93.1     | 255        | 286671  | 76.5     |
| $\tau_{within}$  | 952        | 1003289 | 268      | 945        | 1084125 | 289      | 558        | 583358  | 156      |
| $\tau_{between}$ | 258        | 283370  | 75.5     | 255        | 326706  | 87.2     | 228        | 242592  | 64.8     |
| $\rho_{within}$  | 441        | 468090  | 125      | 364        | 421564  | 113      | 406        | 479428  | 128      |
| $\rho_{between}$ | 81         | 117909  | 31.5     | 64         | 75136   | 20.1     | 51         | 79203   | 21.1     |

**Heidelberger and Welch:** this approach employ two tests, first, it tests the stationarity of MCMC, i.e  $H_0$ : stationarity *holds*, based on Cramer-von-Mises statistic. The iterations are discarded gradually from the estimation and each time the test is performed until the null hypothesis is rejected and the chain passes the test. Second, the resulted stationarity chain, then, passed to the halfwidth test. If the statistic of the halfwidth test is less than a specific limit, say 0.1, this means that the succeeded sample provide a posterior mean estimate with sufficient precision. For SSRIs analysis, the stationarity and the halfwidth test have been passed by all chains of the parameters. The estimated posterior means are very close to our presented estimate in Table 3.

Appendix Table 14 For binomial Bayesian model, the p-value of the stationarity test and halfwidth test and the estimated posterior mean of the stationary part of chain is displayed.

|        | Chain 1                     |                          |         | Chain 2                     |                          |         | Chain 3                     |                          |         |
|--------|-----------------------------|--------------------------|---------|-----------------------------|--------------------------|---------|-----------------------------|--------------------------|---------|
|        | stationarity test (p-value) | halfwidth test (p-value) | mean    | stationarity test (p-value) | halfwidth test (p-value) | mean    | stationarity test (p-value) | halfwidth test (p-value) | mean    |
| $B_1$  | 0.435                       | 4.89e-05                 | 0.0214  | 0.277                       | 4.75e-05                 | 0.0214  | 0.354                       | 4.81e-05                 | 0.0215  |
| $B_2$  | 0.477                       | 0.000219                 | -0.0396 | 0.14                        | 0.000208                 | -0.0395 | 0.621                       | 0.000212                 | -0.0398 |
| $\tau$ | 0.198                       | 7.15e-05                 | 0.00869 | 0.526                       | 7.46e-05                 | 0.0087  | 0.123                       | 7.43e-05                 | 0.00866 |
| $\rho$ | 0.542                       | 0.0176                   | -0.458  | 0.486                       | 0.018                    | -0.469  | 0.4                         | 0.019                    | -0.444  |

Appendix Table 15 For normal Bayesian model, the p-value of the stationarity test and halfwidth test and the estimated posterior mean of the stationary part of chain is displayed.

|        | Chain 1                     |                          |         | Chain 2                     |                          |         | Chain 3                     |                          |         |
|--------|-----------------------------|--------------------------|---------|-----------------------------|--------------------------|---------|-----------------------------|--------------------------|---------|
|        | stationarity test (p-value) | halfwidth test (p-value) | mean    | stationarity test (p-value) | halfwidth test (p-value) | mean    | stationarity test (p-value) | halfwidth test (p-value) | mean    |
| $B_1$  | 0.229                       | 0.000105                 | 0.0209  | 0.112                       | 0.000108                 | 0.021   | 0.541                       | 0.000108                 | 0.0211  |
| $B_2$  | 0.354                       | 0.000332                 | -0.0394 | 0.173                       | 0.000341                 | -0.0395 | 0.829                       | 0.000344                 | -0.0398 |
| $\tau$ | 0.0715                      | 9.55e-05                 | 0.00724 | 0.769                       | 9.74e-05                 | 0.00726 | 0.48                        | 8.94e-05                 | 0.00724 |
| $\rho$ | 0.105                       | 0.0199                   | -0.246  | 0.529                       | 0.0197                   | -0.252  | 0.292                       | 0.0202                   | -0.245  |



Appendix Table 16 For binomial Bayesian model with drug-specific class, the p-value of the stationarity test and halfwidth test and the estimated posterior mean of the stationary part of chain is displayed.

|                  | Chain 1                     |                          |         | Chain 2                     |                          |         | Chain 3                     |                          |         |
|------------------|-----------------------------|--------------------------|---------|-----------------------------|--------------------------|---------|-----------------------------|--------------------------|---------|
|                  | stationarity test (p-value) | halfwidth test (p-value) | mean    | stationarity test (p-value) | halfwidth test (p-value) | mean    | stationarity test (p-value) | halfwidth test (p-value) | mean    |
| $B_1$            | 0.101                       | 5.49e-05                 | 0.0214  | 0.659                       | 5.41e-05                 | 0.0214  | 0.1                         | 5.51e-05                 | 0.0213  |
| $B_2$            | 0.233                       | 0.000248                 | -0.0388 | 0.886                       | 0.00025                  | -0.0388 | 0.108                       | 0.000254                 | -0.0386 |
| $\tau_{within}$  | 0.337                       | 7.18e-05                 | 0.00778 | 0.924                       | 7.28e-05                 | 0.00774 | 0.0666                      | 7.36e-05                 | 0.00773 |
| $\tau_{between}$ | 0.129                       | 6.78e-05                 | 0.00507 | 0.498                       | 6.6e-05                  | 0.00504 | 0.761                       | 6.84e-05                 | 0.0051  |
| $\rho_{within}$  | 0.23                        | 0.0157                   | -0.402  | 0.821                       | 0.0154                   | -0.395  | 0.0609                      | 0.0148                   | -0.387  |
| $\rho_{between}$ | 0.806                       | 0.00667                  | -0.129  | 0.342                       | 0.00668                  | -0.128  | 0.166                       | 0.00662                  | -0.132  |
